# Supplementary material for: Detecting epistasis with the marginal epistasis test in genetic mapping studies of quantitative traits
Source: PubMed Central journal article supplement (PMC5550000; doi:10.1371/journal.pgen.1006869), 2017-07-26

**A**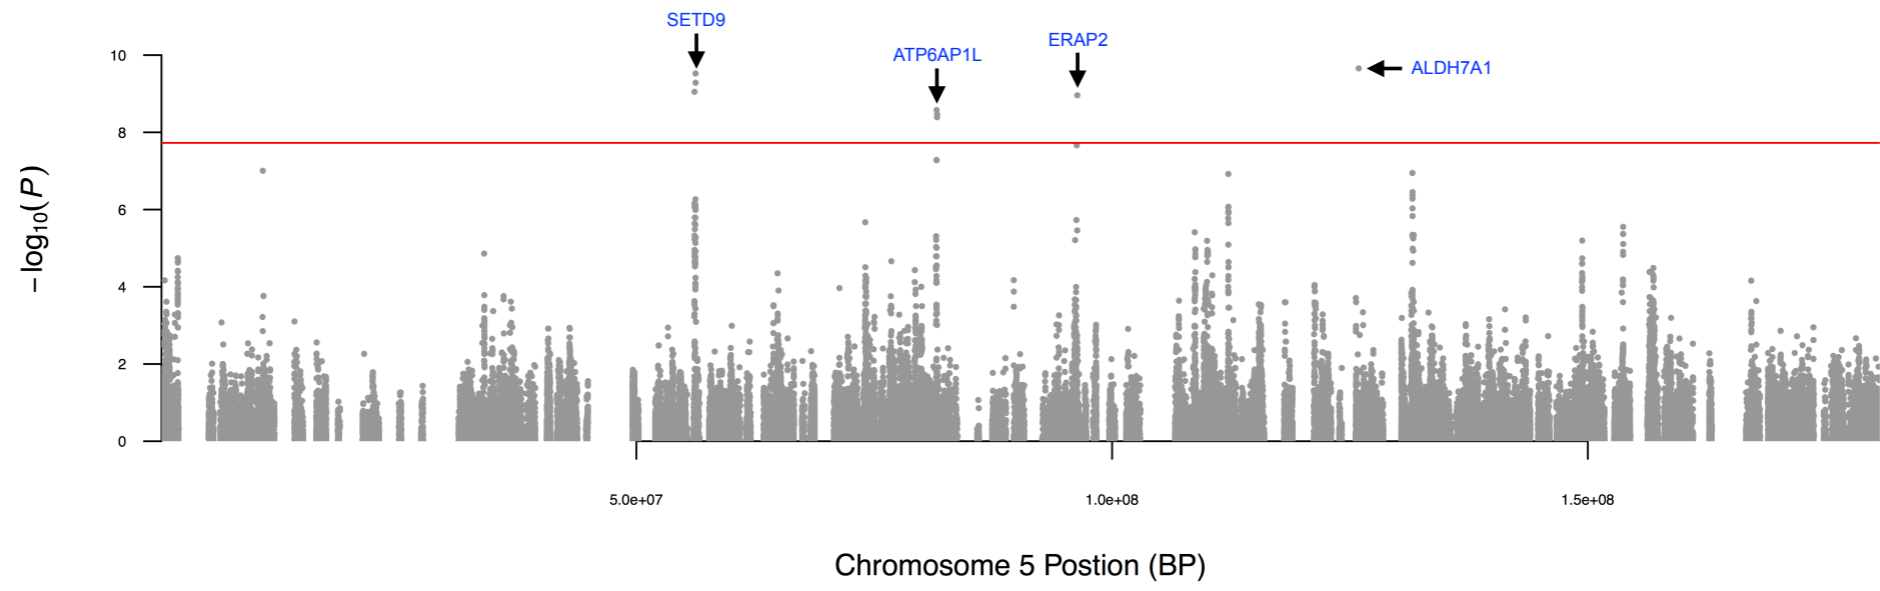**B**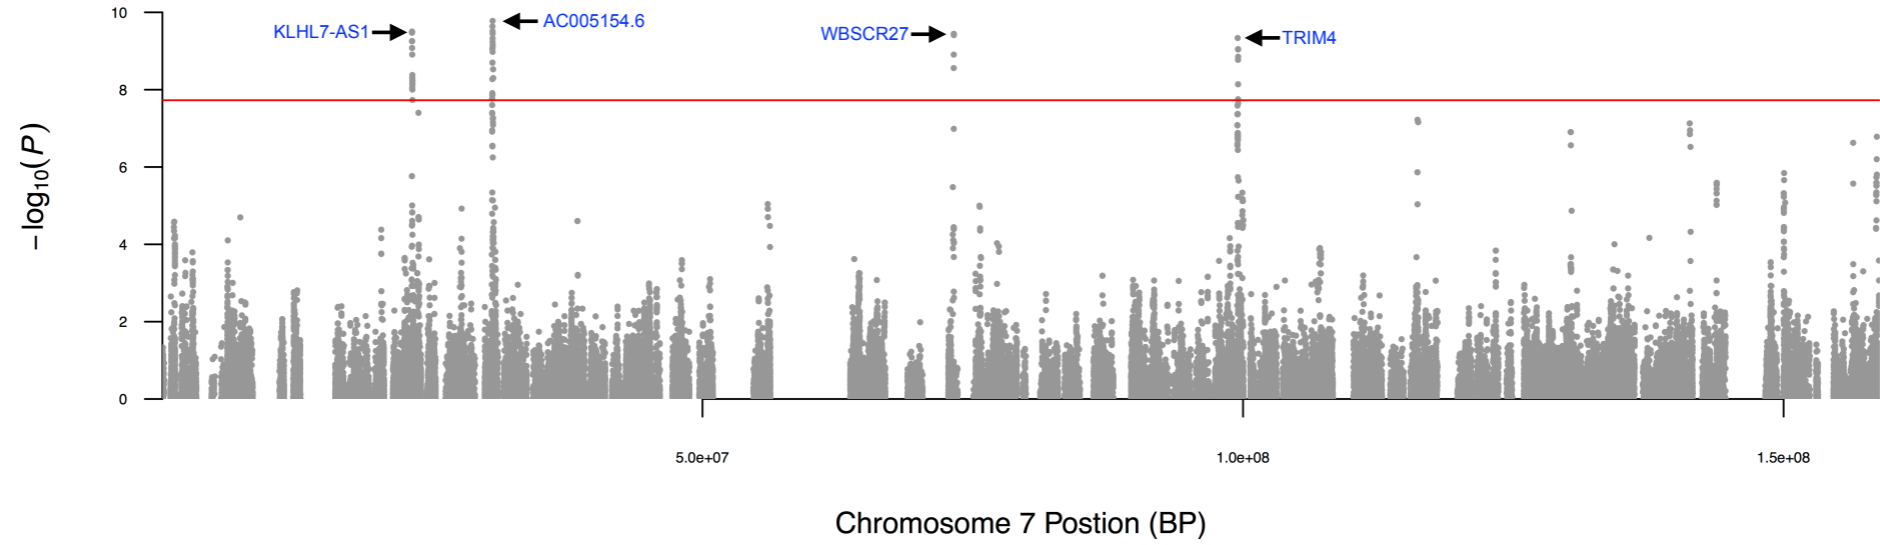**C**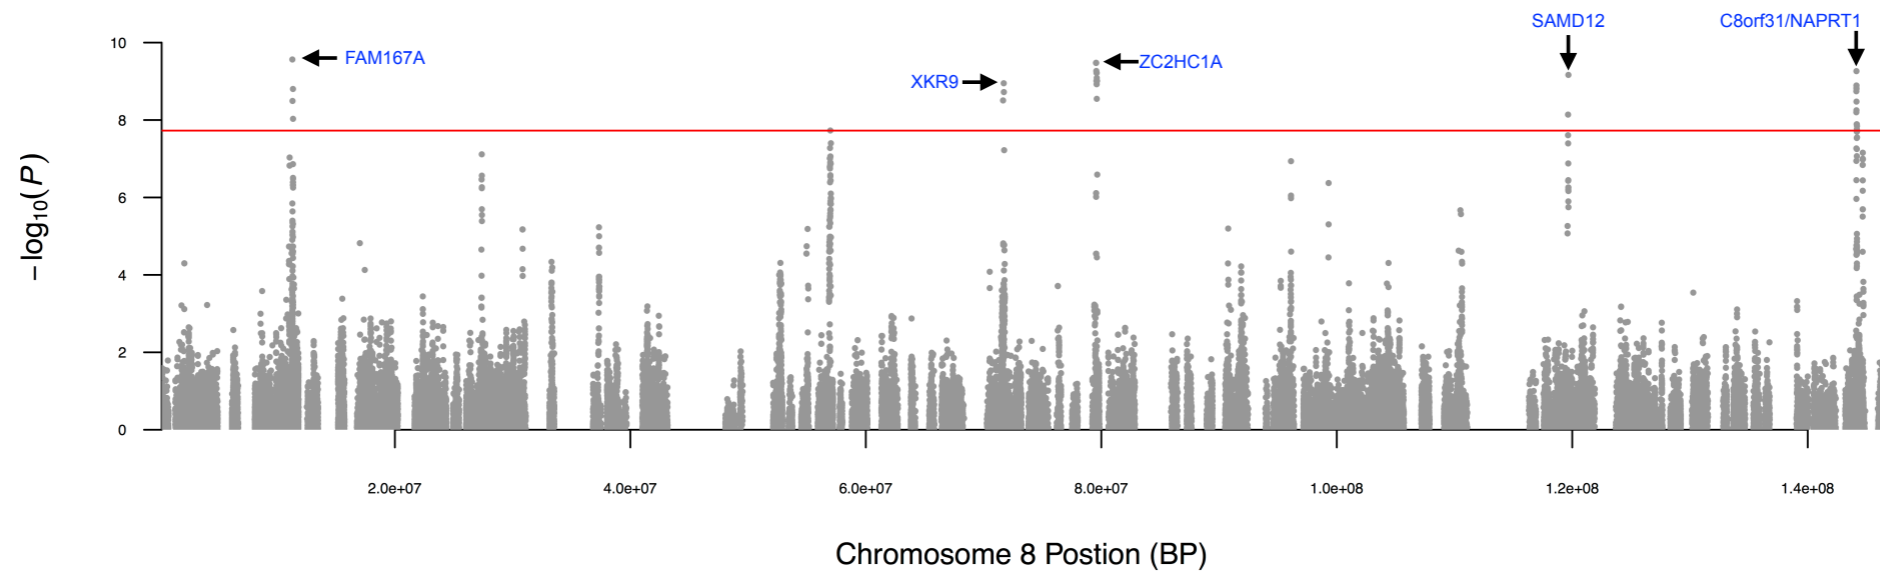

Supplement: pgen.1006869.s020.pdf [file pgen.1006869.s020.pdf]
