# Supplementary material for: Detecting epistasis with the marginal epistasis test in genetic mapping studies of quantitative traits
Source: PubMed Central journal article supplement (PMC5550000; doi:10.1371/journal.pgen.1006869), 2017-07-26
Supplement: pgen.1006869.s026.pdf [file pgen.1006869.s026.pdf]

## S1 Table

**Table S1. Computational complexity for running MAPIT as a function of sample size and the number of SNPs.** Each entry represents the mean computation time (in minutes) it takes to run MAPIT under different hypothesis testing strategies. These tests are the normal test, and the Davies method for approximating a mixture of chi-squares. Computations were performed using 32 cores on Duke University’s Center for Genomic and Computational Biology HARDAC Cluster. To create genetic data for these simulations, we generated  $5 \times 10^3$ ,  $1 \times 10^4$ ,  $5 \times 10^4$ , and  $1 \times 10^5$  genetic markers, respectively. Sample sizes were set to 1,000, 2,500, and 5,000. Values in the parentheses are the standard deviations of the estimates.

| Test          | Average Time (min) |                         |                         |                         |                         |
|---------------|--------------------|-------------------------|-------------------------|-------------------------|-------------------------|
|               | Total Sample Size  | $5 \times 10^3$ Markers | $1 \times 10^4$ Markers | $5 \times 10^4$ Markers | $1 \times 10^5$ Markers |
| Normal Test   | $n = 1,000$        | 1.0 (0.01)              | 2.1 (0.01)              | 10.5 (0.15)             | 20.8 (0.05)             |
|               | $n = 2,500$        | 9.5 (0.03)              | 18.9 (0.08)             | 94.3 (0.63)             | 186.3 (3.53)            |
|               | $n = 5,000$        | 33.8 (0.13)             | 67.6 (0.17)             | 352.1 (9.74)            | 688.5 (19.05)           |
| Davies Method | $n = 1,000$        | 3.0 (0.01)              | 6.1 (0.01)              | 30.3 (0.03)             | 60.6 (0.08)             |
|               | $n = 2,500$        | 45.6 (3.96)             | 108.6 (25.36)           | 422.6 (26.42)           | 855.3 (43.83)           |
|               | $n = 5,000$        | 218.8 (34.94)           | 654.9 (10.37)           | 2578.9 (715.80)         | 4784.9 (2884.72)        |
