# Supplementary material for: Detecting epistasis with the marginal epistasis test in genetic mapping studies of quantitative traits
Source: PubMed Central journal article supplement (PMC5550000; doi:10.1371/journal.pgen.1006869), 2017-07-26
Supplement: pgen.1006869.s027.pdf [file pgen.1006869.s027.pdf]

## S2 Table

**Table S2. Empirical type I error estimates of MAPIT in the presence of population stratification effects (Top 5 PCs).** Each entry represents type I error rate estimates as the proportion of p-values  $a$  under the null hypothesis based on 100 simulated continuous phenotypes for the normal test (or z-test) and the Davies method. These results are based on 100 simulated data sets using simulation model (ii) with the top 5 genotype PCs. Recall that model (ii) is used to evaluate the type I error control of MAPIT when there is population stratification. Empirical size for the analyses used significance thresholds of  $\alpha = 0.05, 0.01,$  and  $0.001$ . Sample sizes were set to 1,000, 1,750, and 2,500. Values in the parentheses are the standard deviations of the estimates.

| Test          | Total Sample Size | $\alpha = 0.05$ | $\alpha = 0.01$ | $\alpha = 0.001$ |
|---------------|-------------------|-----------------|-----------------|------------------|
| Normal Test   | $n = 1,000$       | 0.0605 (0.0099) | 0.0205 (0.0037) | 0.0060 (0.0013)  |
|               | $n = 1,750$       | 0.0588 (0.0073) | 0.0176 (0.0034) | 0.0042 (0.0008)  |
|               | $n = 2,500$       | 0.0531 (0.0058) | 0.0146 (0.0019) | 0.0028 (0.0005)  |
| Davies Method | $n = 1,000$       | 0.0572 (0.0133) | 0.0119 (0.0044) | 0.0011 (0.0008)  |
|               | $n = 1,750$       | 0.0508 (0.0086) | 0.0103 (0.0026) | 0.0010 (0.0004)  |
|               | $n = 2,500$       | 0.0510 (0.0046) | 0.0107 (0.0016) | 0.0009 (0.0003)  |
