# Supplementary material for: Detecting epistasis with the marginal epistasis test in genetic mapping studies of quantitative traits
Source: PLoS Genet. 2017 Jul 26;13(7):e1006869. doi: 10.1371/journal.pgen.1006869 (PMC5550000; doi:10.1371/journal.pgen.1006869)
Supplement: S4 Table — Coverage was computed as the proportion of significant QTL detected by row j that were also identified by column k. (XLSX) [file pgen.1006869.s029.xlsx]

## Sheet: Sheet1
S4 Table: Percentage of overlap (i.e. coverage) between the mepiQTL/eQTL/epiQTL identified by each compared method.
Coverage was computed as the proportion of significant QTL detected by row j that were also identified by column k
	MAPIT (cis)	MAPIT (trans)	MAPIT (GW)	MAPIT (Pop)	GEMMA	GEMMA (Pop)	PLINK	PLINK (Pop)
MAPIT (cis)	1	0.083	0.083	0.104	0.475	0	0.004	0
MAPIT (trans)	0.131	1	1	0.536	0.724	0	0.02	0
MAPIT (GW)	0.131	1	1	0.536	0.724	0	0.02	0
MAPIT (Pop)	0.117	0.379	0.379	1	0.659	0	0.017	0
GEMMA	0.029	0.028	0.028	0.036	1	0	0.002	0
GEMMA (Pop)	0	0	0	0	0	1	0	0
PLINK	0.006	0.022	0.022	0.025	0.04	0	1	0
PLINK (Pop)	0	0	0	0	0	0	0	0
