# Supplementary material for: Detecting epistasis with the marginal epistasis test in genetic mapping studies of quantitative traits
Source: PLoS Genet. 2017 Jul 26;13(7):e1006869. doi: 10.1371/journal.pgen.1006869 (PMC5550000; doi:10.1371/journal.pgen.1006869)
Supplement: S8 Table — Strong significance of association for a particular SNP or locus was determined by using a gene specific Bonferroni-corrected significance p-value threshold P = 0.05/∑i si, where si is the number of cis-SNPs for gene i. Also listed are the corresponding genes whose expressions are associated. (XLSX) [file pgen.1006869.s033.xlsx]

## Sheet: Table_S4
S8 Table: Significant marginal epistatic QTL (mepiQTL) in the GEUVADIS data set using the genome-wide genetic relatedness matrix
Chromosome	Gene Name	mepiQTL	Marginal Epistatic P-value
1	AMIGO1	rs553689	8.32e-09
1	AMIGO1	rs2781556	1.13e-08
1	AMIGO1	rs2781557	1.7e-08
1	AMIGO1	rs2692703	1.7e-08
1	C1orf115	rs11118598	4.61e-09
1	CCDC163P	rs1974271	5.13e-10
1	CCDC163P	rs882803	1.01e-08
1	CCDC163P	rs2356561	1.01e-08
1	CCDC163P	rs2356560	1.01e-08
1	CCDC163P	rs10736426	1.01e-08
1	CCDC163P	rs7536557	1.5e-08
1	CCDC163P	rs7522705	1.47e-08
1	CCDC163P	rs9803979	1.79e-08
1	CCDC163P	rs2356555	1.59e-08
1	CCDC163P	rs6429569	1.5e-08
1	FLVCR1-AS1	rs12097897	1.27e-08
1	FLVCR1-AS1	rs12126017	1.27e-08
1	FLVCR1-AS1	rs10779584	4.04e-10
1	FLVCR1-AS1	rs61832055	2.62e-09
1	FLVCR1-AS1	rs10746438	2.26e-09
1	FLVCR1-AS1	rs10864005	2.62e-09
1	FLVCR1-AS1	rs10864006	1.68e-08
1	FLVCR1-AS1	rs12140831	1.68e-08
1	FLVCR1-AS1	rs2279692	2.62e-09
1	FLVCR1-AS1	rs12023052	2.62e-09
1	FLVCR1-AS1	rs11120049	2.62e-09
1	FLVCR1-AS1	rs10864010	1.35e-09
1	FLVCR1-AS1	rs963328	1.35e-09
1	FLVCR1-AS1	rs10779588	2.01e-09
1	FLVCR1-AS1	rs10779589	1.37e-08
1	FLVCR1-AS1	rs6685877	2.62e-09
1	FLVCR1-AS1	rs4951644	1.35e-09
1	FLVCR1-AS1	rs12123978	2.62e-09
1	FLVCR1-AS1	rs12136117	3.91e-09
1	FLVCR1-AS1	rs7528505	1.35e-09
1	FLVCR1-AS1	rs6540769	2.62e-09
1	FLVCR1-AS1	rs6666167	5.28e-10
1	FLVCR1-AS1	rs7512393	1.35e-09
1	FLVCR1-AS1	rs12125982	1.35e-09
1	FLVCR1-AS1	rs11803450	1.35e-09
1	FLVCR1-AS1	rs12043852	1.35e-09
1	FLVCR1-AS1	rs12404754	2.46e-09
1	FLVCR1-AS1	rs10864023	2.46e-09
1	FLVCR1-AS1	rs1587175	2.46e-09
1	FLVCR1-AS1	rs2359325	2.46e-09
1	FLVCR1-AS1	rs12755947	2.46e-09
1	FLVCR1-AS1	rs12405293	2.46e-09
1	FLVCR1-AS1	rs3207090	2.46e-09
1	FLVCR1-AS1	rs12567976	2.46e-09
1	FLVCR1-AS1	rs10864027	2.46e-09
1	FLVCR1-AS1	rs11586464	4.73e-10
1	FLVCR1-AS1	rs11576299	1.42e-08
1	FLVCR1-AS1	rs4951474	0
1	FLVCR1-AS1	rs12140722	7.2e-09
1	FLVCR1-AS1	rs12140754	5.91e-09
1	FLVCR1-AS1	rs6679848	1.94e-09
1	FLVCR1-AS1	rs6679938	1.94e-09
1	FLVCR1-AS1	rs6679951	1.94e-09
1	FLVCR1-AS1	rs871767	2.85e-09
1	FLVCR1-AS1	rs3816952	8.48e-10
1	FLVCR1-AS1	rs3816953	0
1	FLVCR1-AS1	rs3816957	2.58e-09
1	FLVCR1-AS1	rs11120067	1.94e-09
1	FLVCR1-AS1	rs7523329	2.58e-09
1	FLVCR1-AS1	rs7533476	1.48e-09
1	FLVCR1-AS1	rs6656128	0
1	METTL18	rs74122419	0
1	METTL18	rs12131357	0
1	C1orf216	rs574384	1.75e-09
1	C1orf216	rs676614	2.11e-09
1	C1orf216	rs665046	2.84e-09
1	C1orf216	rs11264213	4.35e-09
1	GBP3	rs61798920	1.15e-08
1	GBP3	rs7520950	1.78e-08
1	QSOX1	rs11126	5.91e-09
1	QSOX1	rs10798741	1.81e-08
1	QSOX1	rs2319651	5.91e-09
1	RWDD3	rs933107	0
1	RWDD3	rs11165339	0
1	RWDD3	rs146672728	1.45e-09
1	RWDD3	rs10747468	2.01e-10
1	RWDD3	rs6678964	0
1	RWDD3	rs6671200	1.32e-09
1	RWDD3	rs640527	0
2	PASK	rs6732666	0
2	PASK	rs78797111	6.08e-10
2	PASK	rs2041085	6.08e-10
2	PASK	rs2270044	6.08e-10
2	PASK	rs2302048	9.14e-10
2	PASK	rs2302051	2.6e-10
2	PASK	rs740393	7.27e-11
2	ALMS1	rs7576824	1.69e-08
2	FAM136A	rs2706767	1.7e-08
2	FAM136A	rs4852461	9.13e-09
2	FAM136A	rs113169655	1.2e-08
2	FAM136A	rs2464699	1.22e-08
2	FAM136A	rs2618232	8.49e-09
2	DYNC2LI1	rs2278358	1.66e-08
2	DYNC2LI1	rs59545826	1.49e-08
2	DYNC2LI1	rs10205936	1.28e-11
2	AC104135.3	rs111899649	8.74e-09
2	AC104135.3	rs10184049	0
2	AC104135.3	rs62148889	3.53e-10
2	AC104135.3	rs4594469	0
2	AC104135.3	rs7589876	2.35e-09
2	AC079922.3	rs13023016	8.19e-10
2	AC079922.3	rs17587043	1.61e-10
2	AC079922.3	rs4849088	0
2	AC104653.1	rs6739861	0
2	AC104653.1	rs10172576	0
2	AC104653.1	rs10210927	0
2	AC104653.1	rs57106417	0
2	AC104653.1	rs12475444	0
2	AC104653.1	rs72948684	0
2	AC104653.1	rs4411702	0
2	AC104653.1	rs11676646	0
2	AC104653.1	rs10185135	0
2	AC104653.1	rs4292101	0
2	AC104653.1	rs10175154	0
2	AC104653.1	rs4849286	0
2	AC104653.1	rs4849287	0
2	AC104653.1	rs11685296	0
2	AC104653.1	rs11675908	3.89e-10
2	AC104653.1	rs4849288	0
2	AC104653.1	rs34169450	0
2	AC104653.1	rs10187493	6.26e-09
2	AC104653.1	rs113162983	0
2	AC104653.1	rs79238088	7.7e-10
2	AC104653.1	rs10187590	0
2	AC104653.1	rs4849290	0
2	AC104653.1	rs7573285	0
2	AC104653.1	rs35167892	0
2	AC104653.1	rs10211038	0
2	AC104653.1	rs62171760	0
2	AC104653.1	rs62171761	0
2	AC104653.1	rs62171763	0
2	AC104653.1	rs113935903	0
2	AC104653.1	rs1949722	0
2	AC104653.1	rs1403400	0
2	AC104653.1	rs79416766	1.33e-08
2	AC104653.1	rs62171765	0
2	AC104653.1	rs1467291	0
2	AC104653.1	rs12465537	0
2	AC104653.1	rs13007971	0
2	AC104653.1	rs7595375	0
2	AC104653.1	rs13009390	0
2	AC104653.1	rs10187984	0
2	AC104653.1	rs62169873	0
2	AC104653.1	rs17045956	0
2	AC104653.1	rs11899049	0
2	AC104653.1	rs13405344	0
2	AC104653.1	rs6710288	9.84e-10
2	MYO1B	rs11681777	1.45e-08
2	PPIL3	rs13412214	4.33e-10
2	PPIL3	rs4381763	4.85e-10
2	PPIL3	rs10172647	7.46e-10
2	PPIL3	rs6754564	5.98e-10
2	PPIL3	rs76637130	2.73e-10
2	PPIL3	rs10167387	6.77e-10
2	PPIL3	rs10205561	6.41e-10
2	PPIL3	rs68133847	1.87e-09
2	PPIL3	rs16836158	3.88e-10
2	PPIL3	rs13413306	5.53e-10
2	PPIL3	rs16836477	1.3e-10
3	ULK4	rs11923562	0
3	ULK4	rs3890604	3.98e-09
3	ULK4	rs1125203	0
3	ULK4	rs9825741	0
3	ULK4	rs9863915	0
3	ULK4	rs9826058	0
3	ULK4	rs9864217	0
3	ULK4	rs9869440	0
3	ULK4	rs17060961	0
3	ULK4	rs9874975	0
3	ULK4	rs7651190	0
3	ULK4	rs9882329	0
3	ULK4	rs6801343	0
3	ULK4	rs28755797	0
3	ULK4	rs73069390	0
3	ULK4	rs9847975	0
3	ULK4	rs73069396	0
3	ULK4	rs6599176	0
3	ULK4	rs17061431	0
3	ULK4	rs9868066	9.93e-10
3	ULK4	rs7650227	9.93e-10
3	ULK4	rs73071304	2.9e-10
3	ULK4	rs73071307	9.93e-10
3	ULK4	rs9311288	7.74e-10
3	ULK4	rs9854838	0
3	ULK4	rs73071315	0
3	ULK4	rs17214987	3.94e-10
3	ULK4	rs73071330	1.59e-10
3	ULK4	rs55744136	1.02e-09
3	ULK4	rs9817510	1.93e-09
3	ULK4	rs7631914	1.01e-09
3	ULK4	rs140636649	0
3	ULK4	rs10452020	1.95e-10
3	ULK4	rs9857175	0
3	ULK4	rs9875107	0
3	ULK4	rs73071337	1.59e-10
3	ULK4	rs145343528	0
3	ULK4	rs6803652	0
3	ULK4	rs76966288	0
3	ULK4	rs73071344	1.59e-10
3	ULK4	rs7615928	1.59e-10
3	ULK4	rs73073323	3.94e-10
3	ULK4	rs12186076	1.2e-09
3	ULK4	rs73828283	4.54e-10
3	ULK4	rs4621303	4.11e-10
3	ULK4	rs73073342	1.38e-09
3	ULK4	rs4973986	0
3	ULK4	rs73073358	0
3	ULK4	rs77537349	3.07e-09
3	ULK4	rs55916959	9.09e-10
3	ULK4	rs73077358	0
3	ULK4	rs73077367	0
3	ULK4	rs60943892	5.83e-10
3	ULK4	rs73077386	0
3	ULK4	rs73077390	0
3	ULK4	rs6795797	3.21e-10
3	ULK4	rs73079307	3.21e-10
3	ULK4	rs73079325	1.28e-09
3	ULK4	rs6790732	4.91e-10
3	ULK4	rs6768128	5.68e-10
3	ULK4	rs6768563	5.68e-10
3	ULK4	rs140597602	8.19e-10
3	ULK4	rs56776628	1.53e-09
3	ULK4	rs148269388	1.49e-08
3	ULK4	rs146835045	7.61e-09
3	ULK4	rs148932987	0
3	ULK4	rs150594648	1.15e-08
3	ULK4	rs9831404	6.52e-09
3	ULK4	rs9816772	9.28e-09
3	ULK4	rs138682464	0
3	ULK4	rs146401092	0
3	ULK4	rs79817383	5.68e-10
3	ULK4	rs7622259	5.68e-10
3	ULK4	rs9810731	5.68e-10
3	ULK4	rs146707962	6.46e-10
3	ULK4	rs144872025	0
3	ULK4	rs113449797	4.56e-09
3	ULK4	rs113471865	6.95e-11
3	ULK4	rs55941479	6.68e-10
3	ULK4	rs56121764	5.76e-10
3	ULK4	rs56081180	5.52e-10
3	ULK4	rs9840532	1.28e-08
3	ULK4	rs11928580	7.7e-10
3	ULK4	rs73079360	0
3	ULK4	rs9824731	5.68e-10
3	ULK4	rs73081321	5.68e-10
3	ULK4	rs9850310	0
3	ULK4	rs12107296	5.68e-10
3	ULK4	rs57653201	0
3	ULK4	rs6802340	4.13e-10
3	ULK4	rs9846634	5.68e-10
3	ULK4	rs9823254	5.68e-10
3	ULK4	rs9866092	5.68e-10
3	ULK4	rs57162396	5.68e-10
3	ULK4	rs1994157	0
3	ULK4	rs73830532	6.18e-09
3	ULK4	rs1717028	5.68e-10
3	ULK4	rs1716674	3.98e-09
3	ULK4	rs1716676	3.98e-09
3	ULK4	rs9832548	2.92e-09
3	ULK4	rs1716679	5.68e-10
3	ULK4	rs1717031	2.21e-09
3	ULK4	rs2625668	2.21e-09
3	ULK4	rs1613759	3.06e-09
3	ULK4	rs1615543	2.25e-09
3	ULK4	rs73081353	2.21e-09
3	ULK4	rs79644581	2.21e-09
3	ULK4	rs1717032	7.97e-10
3	ULK4	rs73081361	0
3	ULK4	rs1617271	4.06e-09
3	ULK4	rs1619558	2.21e-09
3	ULK4	rs17283243	2.21e-09
3	ULK4	rs2683695	0
3	ULK4	rs13325965	0
3	ULK4	rs73081370	2.21e-09
3	ULK4	rs73081372	2.21e-09
3	ULK4	rs1716655	2.21e-09
3	ULK4	rs9839213	4.94e-09
3	ULK4	rs10865914	4.5e-10
3	ULK4	rs6794477	2.21e-09
3	ULK4	rs73081383	2.21e-09
3	ULK4	rs79211428	0
3	ULK4	rs1716666	1.63e-09
3	ULK4	rs17217536	1.63e-09
3	ULK4	rs1716684	1.07e-09
3	ULK4	rs17217746	1.63e-09
3	ULK4	rs73083326	1.63e-09
3	ULK4	rs1629460	1.63e-09
3	ULK4	rs9839399	0
3	ULK4	rs9839491	0
3	ULK4	rs1716999	0
3	ULK4	rs1717000	0
3	ULK4	rs73087368	0
3	ULK4	rs1716696	2.97e-09
3	ULK4	rs1717002	2.47e-10
3	ULK4	rs73087378	2.47e-10
3	ULK4	rs1717004	6.29e-10
3	ULK4	rs73069213	2.56e-09
3	ULK4	rs4615050	2.47e-10
3	ULK4	rs17218103	3.42e-09
3	ULK4	rs1616679	2.47e-10
3	ULK4	rs59476821	2.47e-10
3	ULK4	rs79741604	2.56e-09
3	ULK4	rs78342280	7.69e-10
3	ULK4	rs73069245	5.41e-09
3	ULK4	rs13088394	2.47e-10
3	ULK4	rs11711210	2.56e-09
3	ULK4	rs13088523	1.63e-09
3	ULK4	rs1717034	2.79e-10
3	ULK4	rs1716698	1.16e-09
3	ULK4	rs12108049	2.47e-10
3	ULK4	rs55899232	2.47e-10
3	ULK4	rs1716981	4.18e-10
3	ULK4	rs1716661	6.06e-10
3	ULK4	rs1716982	9.07e-10
3	ULK4	rs1716983	2.21e-09
3	ULK4	rs76319026	1.9e-09
3	ULK4	rs1615243	4.46e-10
3	ULK4	rs1716984	1.11e-09
3	ULK4	rs1716642	0
3	ULK4	rs1716643	1.11e-09
3	ULK4	rs73069277	1.9e-09
3	ULK4	rs150394401	5.88e-10
3	ULK4	rs1716646	1.35e-09
3	ULK4	rs1716652	5.88e-10
3	ULK4	rs1716653	2.83e-09
3	ULK4	rs56207540	5.88e-10
3	ULK4	rs1717020	6.06e-10
3	ULK4	rs73071212	8.93e-10
3	ULK4	rs1717021	6.06e-10
3	ULK4	rs1618445	3.55e-10
3	ULK4	rs1717024	5.96e-10
3	ULK4	rs11129935	6.06e-10
3	ULK4	rs9876960	3.55e-10
3	ULK4	rs1716694	6.06e-10
3	ULK4	rs17284313	9.07e-10
3	ULK4	rs1716695	6.06e-10
3	ULK4	rs113803925	2.69e-09
3	ULK4	rs140020439	3.55e-10
3	ULK4	rs17284472	3.55e-10
3	ULK4	rs60690674	3.55e-10
3	ULK4	rs56728371	3.55e-10
3	ULK4	rs79323474	5.59e-10
3	ULK4	rs73071261	6.53e-10
3	ULK4	rs56290987	3.16e-10
3	ULK4	rs73073226	5.3e-10
3	ULK4	rs73073233	1.03e-09
3	ULK4	rs58916656	5.3e-10
3	ULK4	rs73073238	6.27e-10
3	ULK4	rs73073301	0
3	ULK4	rs112912733	1.74e-08
3	ULK4	rs115702638	1.74e-08
3	EAF2	rs6794341	6.19e-09
3	EAF2	rs1574115	6.19e-09
3	EAF2	rs10804555	1e-08
4	CRIPAK	rs3903127	9.21e-10
4	SCD5	rs10029355	3.6e-09
4	SCD5	rs13112559	3.93e-09
4	ZNF718	rs13145153	9.86e-09
4	ZNF718	rs59603164	0
4	ZNF718	rs7667153	8.07e-11
4	ZNF718	rs2006748	8.07e-11
4	ZNF718	rs2097491	8.07e-11
4	ZNF718	rs28752145	0
4	ZNF718	rs11727494	0
4	FAM53A	rs2247341	0
4	FAM53A	rs798746	1.94e-09
4	FAM53A	rs798751	0
4	FAM53A	rs798754	7.12e-10
4	FAM53A	rs812251	0
4	FAM53A	rs1793990	0
4	FAM53A	rs112182776	0
4	FAM53A	rs2592826	1.77e-09
4	FAM53A	rs1665364	7.12e-10
4	FAM53A	rs1665366	7.12e-10
4	FAM53A	rs1665368	7.12e-10
4	FAM53A	rs3819376	7.12e-10
4	FAM53A	rs9985880	3.8e-09
4	SLC10A7	rs9308197	7.34e-10
4	MLF1IP	rs12502771	0
4	MLF1IP	rs4862411	2.63e-09
5	ALDH7A1	rs7726892	0
5	ALDH7A1	rs4597966	2.2e-10
5	SETD9	rs832553	8.9e-10
5	SETD9	rs832534	0
5	SETD9	rs113772507	2.98e-10
5	SETD9	rs832531	5.18e-10
5	SETD9	rs832402	0
5	SETD9	rs73122138	0
5	SETD9	rs2408652	0
5	SETD9	rs7722803	0
5	SETD9	rs17732475	0
5	MRPL36	rs60542979	0
5	MRPL36	rs4975731	0
5	MRPL36	rs35380881	0
5	MRPL36	rs3776146	0
5	MRPL36	rs6863367	0
5	MRPL36	rs28402979	0
5	MRPL36	rs4975852	0
5	MRPL36	rs6899016	0
5	MRPL36	rs10447190	0
5	MRPL36	rs6864000	0
5	MRPL36	rs6864281	0
5	MRPL36	rs7701970	0
5	MRPL36	rs58926651	0
5	NSA2	rs60492282	0
5	ATP6AP1L	rs185207161	2.64e-09
5	ATP6AP1L	rs226208	0
5	ATP6AP1L	rs224823	4.06e-09
5	ATP6AP1L	rs3734115	0
5	ATP6AP1L	rs59984974	3.42e-09
5	PDLIM4	rs10058655	0
5	PDLIM4	rs10051679	0
5	PDLIM4	rs12055301	0
5	ERAP2	rs38029	1.1e-09
6	TMEM200A	rs12200943	0
6	TMEM200A	rs10457542	0
6	TMEM200A	rs6941691	0
6	TMEM200A	rs4897396	0
6	TMEM200A	rs7748765	3.66e-09
6	TMEM200A	rs7749097	0
6	TMEM200A	rs12212688	6.28e-09
6	TMEM200A	rs12206502	6.28e-09
6	TMEM200A	rs12199323	6.28e-09
6	TMEM200A	rs12200688	1.23e-08
6	TMEM200A	rs12214250	6.28e-09
6	TMEM200A	rs4895873	6.28e-09
6	TMEM200A	rs1513545	3.95e-09
6	TMEM200A	rs1849526	5.51e-09
6	TMEM200A	rs2089998	1.59e-08
6	TMEM200A	rs11154560	5.51e-09
6	TMEM200A	rs7765872	5.51e-09
6	TMEM200A	rs7766039	3.95e-09
6	TMEM200A	rs7770566	3.95e-09
6	TMEM200A	rs1471441	3.95e-09
6	TMEM200A	rs1966965	3.95e-09
6	TMEM200A	rs12525895	3.46e-09
6	TMEM200A	rs6916510	5.19e-09
6	TMEM200A	rs12213521	0
6	TMEM200A	rs12207587	0
6	TMEM200A	rs2876095	0
6	TMEM200A	rs62433911	0
6	TMEM200A	rs62433912	0
6	TMEM200A	rs1828695	7.92e-10
6	TMEM200A	rs75373752	0
6	TMEM200A	rs1398820	1.15e-08
6	TMEM200A	rs4349832	9.63e-09
6	TMEM200A	rs1983718	1.26e-08
6	TMEM200A	rs1983720	0
6	TMEM200A	rs2037020	0
6	TMEM200A	rs2024972	0
6	TMEM200A	rs2024973	0
6	TMEM200A	rs6932318	0
6	TMEM200A	rs9492535	0
6	TMEM200A	rs9492536	0
6	TMEM200A	rs9492537	0
6	TMEM200A	rs9492538	0
6	TMEM200A	rs9492539	0
6	TMEM200A	rs9492542	0
6	TMEM200A	rs7759052	0
6	TMEM200A	rs12202591	0
6	TMEM200A	rs7745033	0
6	TMEM200A	rs9492544	0
6	TMEM200A	rs9492546	0
6	TMEM200A	rs10872361	0
6	TMEM200A	rs10457551	0
6	TMEM200A	rs62431436	0
6	TMEM200A	rs6928618	0
6	TMEM200A	rs9483108	1.12e-09
6	TMEM200A	rs4897409	0
6	TMEM200A	rs6940357	0
6	TMEM200A	rs6940373	0
6	TMEM200A	rs6940232	0
6	TMEM200A	rs9321222	0
6	TMEM200A	rs7741217	0
6	TMEM200A	rs4895880	0
6	TMEM200A	rs4897410	0
6	TMEM200A	rs2326939	0
6	TMEM200A	rs7742461	0
6	TMEM200A	rs6569675	0
6	TMEM200A	rs6909415	0
6	TMEM200A	rs6909334	0
6	TMEM200A	rs6909986	0
6	TMEM200A	rs6910182	0
6	TMEM200A	rs7751841	0
6	TMEM200A	rs12111433	0
6	TMEM200A	rs899276	0
6	TMEM200A	rs9492550	8.33e-10
6	TMEM200A	rs9398942	0
6	TMEM200A	rs72992428	0
6	TMEM200A	rs724324	0
6	TMEM200A	rs1546554	0
6	TMEM200A	rs720711	0
6	TMEM200A	rs4141939	0
6	TMEM200A	rs4141940	0
6	TMEM200A	rs6569676	0
6	TMEM200A	rs75865578	0
6	TMEM200A	rs12526519	0
6	TMEM200A	rs3813365	0
6	TMEM200A	rs9483112	0
6	TMEM200A	rs7765694	0
6	TMEM200A	rs7765838	0
6	TMEM200A	rs62432197	0
6	TMEM200A	rs6935211	0
6	TMEM200A	rs9492551	0
6	TMEM200A	rs10872362	0
6	TMEM200A	rs10872363	0
6	TMEM200A	rs6905710	0
6	TMEM200A	rs7753983	0
6	TMEM200A	rs12209659	0
6	TMEM200A	rs1975952	5.29e-09
6	TMEM200A	rs6914642	0
6	TMEM200A	rs6916087	8.33e-10
6	TMEM200A	rs13362616	0
6	TMEM200A	rs13362726	0
6	TMEM200A	rs907785	0
6	TMEM200A	rs12200185	0
6	TMEM200A	rs72992440	0
6	TMEM200A	rs4897414	0
6	TMEM200A	rs144826206	1.25e-10
6	TMEM200A	rs144986845	0
6	TMEM200A	rs10457552	8.33e-10
6	TMEM200A	rs6914528	0
6	TMEM200A	rs11154571	0
6	TMEM200A	rs12207251	0
6	TMEM200A	rs10046393	0
6	TMEM200A	rs9321223	0
6	TMEM200A	rs12199266	0
6	TMEM200A	rs9483115	8.33e-10
6	TMEM200A	rs9483116	0
6	TMEM200A	rs6906178	0
6	TMEM200A	rs4897415	0
6	TMEM200A	rs12192053	0
6	TMEM200A	rs11154573	6.35e-10
6	TMEM200A	rs1975953	0
6	TMEM200A	rs6923619	0
6	TMEM200A	rs3813363	0
6	TMEM200A	rs6930137	0
6	TMEM200A	rs4897417	5.62e-10
6	TMEM200A	rs2127022	0
6	TMEM200A	rs11965497	5.62e-10
6	TMEM200A	rs12202427	0
6	TMEM200A	rs2011841	2.86e-09
6	TMEM200A	rs73611680	0
6	TMEM200A	rs9492569	0
6	TMEM200A	rs7761111	5.97e-09
6	TMEM200A	rs7744698	1.25e-08
6	TMEM200A	rs11753754	1.25e-08
6	TMEM200A	rs12206635	0
6	TMEM200A	rs9321225	1.76e-08
6	TMEM200A	rs11154575	1.76e-08
6	TMEM200A	rs1553993	5.97e-09
6	TMEM200A	rs73614166	0
6	TMEM200A	rs6904914	0
6	TMEM200A	rs9492580	7e-09
6	TMEM200A	rs62432235	1.76e-08
6	TMEM200A	rs7759150	5.97e-09
6	TMEM200A	rs6907753	1.25e-08
6	TMEM200A	rs6908694	1.25e-08
6	TMEM200A	rs1513540	0
6	TMEM200A	rs6569681	5.97e-09
6	TMEM200A	rs6420748	0
6	TMEM200A	rs6569682	0
6	TMEM200A	rs6913055	1.63e-08
6	TMEM200A	rs6919251	0
6	TMEM200A	rs7743080	0
6	TMEM200A	rs12193479	0
6	TMEM200A	rs6904437	0
6	TMEM200A	rs17058997	4.63e-09
6	TMEM200A	rs716301	3.87e-09
6	TMEM200A	rs12200105	8.33e-10
6	TMEM200A	rs3813359	0
6	TMEM200A	rs9492594	8.26e-10
6	TMEM200A	rs12197787	0
6	TMEM200A	rs9321227	8.81e-10
6	TMEM200A	rs2025352	0
6	TMEM200A	rs56194902	1.44e-08
6	TMEM200A	rs11154581	1.09e-09
6	TMEM200A	rs2069129	1.37e-08
6	SNHG5	rs9444354	1.19e-08
6	SNHG5	rs138836274	7.04e-09
6	SNHG5	rs36088473	1.2e-09
6	SNHG5	rs2842612	4.25e-09
6	SNHG5	rs9362230	8.27e-10
6	SNHG5	rs7775788	8.27e-10
6	SNHG5	rs2842613	8.27e-10
6	SNHG5	rs2842614	1.45e-09
6	SNHG5	rs2758843	5.96e-09
6	SNHG5	rs2842602	6.06e-10
6	SNHG5	rs111533912	8.27e-10
6	SNHG5	rs7749600	8.27e-10
6	SNHG5	rs2842603	7.04e-09
6	SNHG5	rs13194512	8.27e-10
6	SNHG5	rs6909654	6.76e-09
6	SNHG5	rs6909402	4.24e-09
6	SNHG5	rs9450309	7.05e-09
6	SNHG5	rs4145082	1.48e-09
6	SNHG5	rs9344539	1.32e-08
6	SNHG5	rs9362233	8.27e-10
6	SNHG5	rs9351065	8.27e-10
6	SNHG5	rs9444356	1.14e-09
6	SNHG5	rs9353324	1.06e-09
6	SNHG5	rs7771577	1.09e-09
6	SNHG5	rs149914588	1.02e-09
6	SNHG5	rs7757864	1.03e-08
6	SNHG5	rs2783171	5.82e-09
6	SNHG5	rs1059306	1.02e-09
6	SNHG5	rs13192070	3.26e-10
6	SNHG5	rs2475792	1.09e-09
6	SNHG5	rs9444361	0
6	SNHG5	rs1173418	1.17e-09
6	SNHG5	rs2484356	1.46e-09
6	SNHG5	rs7752502	1.09e-09
6	SNHG5	rs9450318	0
6	SNHG5	rs9342046	1.22e-09
6	SNHG5	rs12197463	1.54e-09
6	SNHG5	rs34765423	1.29e-09
6	CMAHP	rs2166683	1.38e-08
6	AHI1	rs59326237	0
6	AHI1	rs4373375	0
6	AHI1	rs9389295	0
6	AHI1	rs9494269	1.69e-10
6	AHI1	rs9389301	2.95e-10
6	AHI1	rs9483847	1.69e-10
6	BTN3A2	rs6923139	0
6	BTN3A2	rs112368323	0
6	BTN3A2	rs9461242	0
6	BTN3A2	rs766406	0
6	BTN3A2	rs6903015	0
6	BTN3A2	rs9358925	0
6	BTN3A2	rs6908156	0
6	BTN3A2	rs11756569	0
6	BTN3A2	rs6939799	0
6	BTN3A2	rs77338776	6.11e-10
6	BTN3A2	rs35942569	0
6	SLC18B1	rs9493436	0
6	SLC18B1	rs9493437	0
6	SLC18B1	rs11964512	0
6	SLC18B1	rs7770081	0
6	SLC18B1	rs1122175	0
6	SLC18B1	rs1467403	0
6	SLC18B1	rs9389032	0
6	SLC18B1	rs9402452	0
6	SLC18B1	rs9493438	0
6	SLC18B1	rs10457591	0
6	SLC18B1	rs6912936	0
6	SLC18B1	rs112556619	0
6	SLC18B1	rs9493441	0
6	SLC18B1	rs11962883	1.84e-09
6	SLC18B1	rs12211701	1.15e-08
6	SLC18B1	rs77995783	0
6	SLC18B1	rs9321371	0
6	SLC18B1	rs61632110	0
6	SLC18B1	rs12203977	0
6	SLC18B1	rs12204027	0
6	SLC18B1	rs12191058	0
6	SLC18B1	rs12194802	0
6	SLC18B1	rs9493447	0
6	SLC18B1	rs5006218	0
6	SLC18B1	rs12215084	0
6	SLC18B1	rs6911773	0
6	SLC18B1	rs74298526	0
6	SLC18B1	rs62425113	0
6	SLC18B1	rs17061751	0
6	SLC18B1	rs60062075	0
6	SLC18B1	rs56170227	0
6	SLC18B1	rs12211425	0
6	SLC18B1	rs3756968	0
6	SLC18B1	rs7769354	2.29e-10
6	SLC18B1	rs9402457	6.24e-09
6	SLC18B1	rs9385623	0
6	SLC18B1	rs9375927	6.92e-11
6	SLC18B1	rs12212856	1.68e-09
6	RP1-153P14.8	rs9462313	0
6	RP1-153P14.8	rs11756241	1.89e-10
6	RP1-153P14.8	rs73409227	3.09e-10
6	RP1-153P14.8	rs2797790	0
6	RP1-153P14.8	rs904251	0
6	RP1-153P14.8	rs1317563	0
6	RP1-153P14.8	rs113818906	0
6	RP1-153P14.8	rs9462316	0
6	RP1-153P14.8	rs9369005	1.69e-10
6	RP1-153P14.8	rs6921922	0
6	RP1-153P14.8	rs1776456	0
6	RPS12	rs9483504	1.68e-08
6	RPS12	rs9493451	1.68e-08
6	RPS12	rs9399044	1.68e-08
6	RPS12	rs62425132	1.68e-08
6	RPS12	rs9493455	1.13e-09
6	RPS12	rs10457595	1.97e-09
6	RPS12	rs6907421	4.36e-09
6	RPS12	rs7764152	1.97e-09
6	RPS12	rs62425137	0
6	RPS12	rs12192765	1.97e-09
6	RPS12	rs7774585	1.97e-09
6	RPS12	rs9321376	0
6	RPS12	rs9321377	1.97e-09
6	RPS12	rs9493459	0
6	RPS12	rs9375922	2.27e-09
6	RPS12	rs12215535	5.15e-10
6	RPS12	rs9321379	0
6	RPS12	rs7766944	1.04e-08
6	RPS12	rs7768053	7.12e-10
6	RPS12	rs7768470	7.12e-10
6	RPS12	rs12200907	1.04e-08
6	RPS12	rs12193918	7.12e-10
6	RPS12	rs12207260	7.12e-10
6	RPS12	rs1359142	7.12e-10
6	RPS12	rs7759900	7.12e-10
6	RPS12	rs6569857	2.71e-09
6	RPS12	rs6569858	6.59e-10
6	RPS12	rs6569859	0
6	RPS12	rs1965895	0
6	RPS12	rs1001018	0
6	RPS12	rs7751333	0
6	RPS12	rs7751359	2.3e-09
6	RPS12	rs7755422	0
6	RPS12	rs7756588	0
6	RPS12	rs9402460	0
6	RPS12	rs9402461	0
6	RPS12	rs1124450	0
6	RPS12	rs6925225	3.81e-09
6	RPS12	rs1408062	6.46e-10
6	RPS12	rs1408063	0
6	RPS12	rs9375924	1.56e-09
6	RPS12	rs9375925	0
6	RPS12	rs9402462	0
6	RPS12	rs7743635	0
6	RPS12	rs7744235	0
6	RPS12	rs7764252	0
6	RPS12	rs7744426	0
6	RPS12	rs9493464	0
6	RPS12	rs7764726	0
6	RPS12	rs74940088	0
6	RPS12	rs7749419	0
6	RPS12	rs4897616	0
6	RPS12	rs4897617	0
6	RPS12	rs4897618	0
6	RPS12	rs4895945	0
6	RPS12	rs10457596	0
6	RPS12	rs9402463	0
6	RPS12	rs12200485	0
6	RPS12	rs12215941	4.25e-10
6	RPS12	rs12215088	2.61e-10
6	RPS12	rs62424543	6.06e-10
6	RPS12	rs1903143	1.3e-10
6	RPS12	rs12209144	0
6	RPS12	rs7740291	2.55e-10
6	RPS12	rs12199062	1.3e-09
6	RPS12	rs12199310	1.72e-09
6	RPS12	rs1380259	1.3e-09
6	RPS12	rs79022471	9.8e-09
6	ALDH8A1	rs4895435	1e-08
6	ALDH8A1	rs7755680	1e-08
6	ALDH8A1	rs9373118	1e-08
6	MRPS10	rs9471801	8.52e-11
6	MRPS10	rs9471802	1.75e-09
6	MRPS10	rs9462779	1.75e-09
6	MRPS10	rs6914807	6.31e-10
6	MRPS10	rs6915118	1.04e-09
6	MRPS10	rs6937742	8.75e-10
6	MRPS10	rs9462780	9.65e-10
6	MRPS10	rs9462782	6.08e-11
6	MRPS10	rs9688757	5.32e-10
6	MRPS10	rs56402927	1.04e-09
6	MRPS10	rs7746021	8.42e-10
6	MRPS10	rs7750260	1.04e-09
6	MRPS10	rs2395803	8.42e-10
6	MRPS10	rs9369346	5.32e-10
6	MRPS10	rs4714576	1.64e-08
6	MRPS10	rs34197187	3.86e-09
6	MRPS10	rs1474867	1.57e-08
6	MRPS10	rs2395804	1.57e-08
6	MRPS10	rs9381154	3.86e-09
6	MRPS10	rs1065236	1.57e-08
6	MRPS10	rs6924589	1.57e-08
6	MRPS10	rs6925368	1.52e-08
6	MRPS10	rs9357390	3.86e-09
6	MRPS10	rs10948026	6.14e-09
6	MRPS10	rs2144444	3.86e-09
6	MRPS10	rs3199639	1.74e-08
6	MRPS10	rs6936290	1.08e-08
6	MRPS10	rs55734519	1.57e-08
6	MRPS10	rs4714582	1.57e-08
6	MRPS10	rs10948027	5.18e-09
6	MRPS10	rs2273281	1.57e-08
6	MRPS10	rs13197564	3.86e-09
6	MRPS10	rs9471809	4e-09
6	MRPS10	rs9471810	4e-09
6	MRPS10	rs7757788	2.93e-09
6	MRPS10	rs9462783	2.93e-09
6	MRPS10	rs7762791	2.93e-09
6	MRPS10	rs7763375	2.93e-09
6	MRPS10	rs10452607	5.28e-09
6	MRPS10	rs4714584	3.03e-10
6	MRPS10	rs9462784	3.45e-09
6	RNGTT	rs2236287	8.07e-09
6	PEX6	rs112122607	0
6	PEX6	rs13215983	0
6	PEX6	rs4714640	0
6	PEX6	rs9296403	0
6	PEX6	rs112538187	0
6	PEX6	rs9471978	1.48e-08
6	PEX6	rs3800292	0
6	PEX6	rs4987174	0
6	PEX6	rs2274517	1.48e-08
6	PEX6	rs35830695	0
6	PEX6	rs2274514	0
6	PEX6	rs73432562	0
6	PEX6	rs3805952	0
6	PEX6	rs73733774	1.48e-08
7	TRIM4	rs35432946	0
7	TRIM4	rs2527913	0
7	TRIM4	rs2572002	4.61e-10
7	TRIM4	rs74608266	0
7	TRIM4	rs2571995	0
7	TRIM4	rs2527901	0
7	TRIM4	rs2107351	9e-10
7	TRIM4	rs11979058	1.69e-09
7	TRIM4	rs2527894	9e-10
7	TRIM4	rs2404975	9e-10
7	TRIM4	rs1981548	1.76e-08
7	TRIM4	rs2525534	7.23e-09
7	TRIM4	rs2525535	9.12e-10
7	TRIM4	rs10215184	1.41e-09
7	WBSCR27	rs7798477	2.76e-09
7	WBSCR27	rs6974378	1.24e-09
7	WBSCR27	rs4640941	3.61e-10
7	WBSCR27	rs4458741	3.61e-10
7	WBSCR27	rs8629	3.61e-10
7	WBSCR27	rs6968360	3.87e-10
7	WBSCR27	rs13247441	3.87e-10
7	WBSCR27	rs13244770	0
7	KLHL7-AS1	rs2014768	0
7	KLHL7-AS1	rs10256359	3.26e-10
7	KLHL7-AS1	rs10256361	0
7	KLHL7-AS1	rs28499396	0
7	KLHL7-AS1	rs7784929	3.26e-10
7	KLHL7-AS1	rs7789237	0
7	KLHL7-AS1	rs6978827	0
7	KLHL7-AS1	rs9691762	0
7	KLHL7-AS1	rs7790157	3.26e-10
7	KLHL7-AS1	rs4409314	3.26e-10
7	KLHL7-AS1	rs4321896	0
7	KLHL7-AS1	rs6967475	0
7	KLHL7-AS1	rs6960001	0
7	KLHL7-AS1	rs10237755	0
7	KLHL7-AS1	rs28483572	3.36e-10
7	KLHL7-AS1	rs61292332	3.13e-10
7	KLHL7-AS1	rs59073109	0
7	KLHL7-AS1	rs7788821	0
7	KLHL7-AS1	rs6956595	0
7	KLHL7-AS1	rs6961131	0
7	KLHL7-AS1	rs6961406	0
7	KLHL7-AS1	rs6461690	5.49e-10
7	KLHL7-AS1	rs6967419	0
7	KLHL7-AS1	rs10266123	0
7	KLHL7-AS1	rs1115941	0
7	KLHL7-AS1	rs10231555	5.57e-10
7	KLHL7-AS1	rs6461691	5.57e-10
7	KLHL7-AS1	rs28646184	8.31e-10
7	KLHL7-AS1	rs10235786	5.57e-10
7	KLHL7-AS1	rs12700412	0
7	KLHL7-AS1	rs1468592	0
7	KLHL7-AS1	rs4628176	0
7	KLHL7-AS1	rs7456915	0
7	KLHL7-AS1	rs13438179	0
7	KLHL7-AS1	rs13438188	0
7	KLHL7-AS1	rs10241208	0
7	KLHL7-AS1	rs10256524	0
7	KLHL7-AS1	rs1034963	3.16e-10
7	KLHL7-AS1	rs10235467	0
7	KLHL7-AS1	rs6980224	9.47e-09
7	KLHL7-AS1	rs10239760	0
7	KLHL7-AS1	rs111279824	0
7	KLHL7-AS1	rs73272048	1.23e-09
7	KLHL7-AS1	rs764533	8.54e-09
7	KLHL7-AS1	rs764534	0
7	KLHL7-AS1	rs2068459	0
7	KLHL7-AS1	rs10255228	0
7	KLHL7-AS1	rs6971673	0
7	KLHL7-AS1	rs6461693	4.85e-09
7	KLHL7-AS1	rs7805206	0
7	KLHL7-AS1	rs10278700	0
7	KLHL7-AS1	rs3807452	0
7	KLHL7-AS1	rs10271613	0
7	KLHL7-AS1	rs10242166	0
7	KLHL7-AS1	rs11982002	6.95e-09
7	KLHL7-AS1	rs2058275	5.14e-09
7	KLHL7-AS1	rs15775	0
7	KLHL7-AS1	rs929507	4.16e-09
7	KLHL7-AS1	rs929508	5.92e-09
7	KLHL7-AS1	rs6968242	5.92e-09
7	KLHL7-AS1	rs1981665	9.94e-09
7	KLHL7-AS1	rs6969733	7.29e-09
7	KLHL7-AS1	rs4599714	0
7	KLHL7-AS1	rs4624924	0
7	KLHL7-AS1	rs10278776	5.92e-09
7	KLHL7-AS1	rs3735228	0
7	KLHL7-AS1	rs4140959	5.92e-09
7	KLHL7-AS1	rs6953020	5.92e-09
7	KLHL7-AS1	rs13438452	5.92e-09
7	KLHL7-AS1	rs6948469	0
7	KLHL7-AS1	rs6953996	7.29e-09
7	KLHL7-AS1	rs7791200	0
7	KLHL7-AS1	rs4377861	0
7	KLHL7-AS1	rs4294098	0
7	KLHL7-AS1	rs6976957	0
7	KLHL7-AS1	rs10280815	0
7	KLHL7-AS1	rs10225608	0
7	KLHL7-AS1	rs10270695	0
7	KLHL7-AS1	rs7805085	0
7	KLHL7-AS1	rs2390755	0
7	KLHL7-AS1	rs4365988	0
7	KLHL7-AS1	rs2141307	0
7	KLHL7-AS1	rs2178139	0
7	KLHL7-AS1	rs6949363	0
7	KLHL7-AS1	rs12538942	0
7	KLHL7-AS1	rs1881202	0
7	KLHL7-AS1	rs2103281	0
7	KLHL7-AS1	rs955187	0
7	KLHL7-AS1	rs6961136	0
7	KLHL7-AS1	rs6960118	0
7	KLHL7-AS1	rs858249	0
7	KLHL7-AS1	rs858248	0
7	KLHL7-AS1	rs858244	0
7	KLHL7-AS1	rs1637223	0
7	KLHL7-AS1	rs6943926	0
7	KLHL7-AS1	rs1728322	0
7	KLHL7-AS1	rs1637220	0
7	KLHL7-AS1	rs1637219	0
7	KLHL7-AS1	rs4473921	0
7	KLHL7-AS1	rs858306	0
7	KLHL7-AS1	rs858304	0
7	KLHL7-AS1	rs858303	0
7	CASD1	rs42518	0
7	AC005154.6	rs38421	1.69e-08
7	AC005154.6	rs38442	1.23e-08
7	AC005154.6	rs38444	1.33e-08
7	AC005154.6	rs38445	5.31e-09
7	AC005154.6	rs38446	8.87e-10
7	AC005154.6	rs38447	1.38e-08
7	AC005154.6	rs1974545	1.38e-08
7	AC005154.6	rs38453	2.01e-09
7	AC005154.6	rs38455	2.31e-10
7	AC005154.6	rs38457	1.99e-09
7	AC005154.6	rs38465	5.82e-10
7	AC005154.6	rs38467	3.1e-10
7	AC005154.6	rs38468	8.02e-10
7	AC005154.6	rs38469	1.66e-10
7	AC005154.6	rs4258	1.05e-09
7	AC005154.6	rs764046	4.7e-10
7	AC005154.6	rs17159202	0
7	AC005154.6	rs73311258	3.54e-10
7	AC005154.6	rs38483	6.92e-10
7	AC005154.6	rs77213416	2.97e-09
7	AC005154.6	rs728539	5e-09
8	ZC2HC1A	rs922928	3.34e-10
8	ZC2HC1A	rs6999228	3.34e-10
8	ZC2HC1A	rs62517750	3.34e-10
8	ZC2HC1A	rs2015125	3.34e-10
8	ZC2HC1A	rs1809476	0
8	ZC2HC1A	rs3808619	5.41e-10
8	ZC2HC1A	rs7839152	9.72e-10
8	ZC2HC1A	rs62518976	6.03e-10
8	ZC2HC1A	rs1872072	1.18e-09
8	ZC2HC1A	rs77267722	6.03e-10
8	ZC2HC1A	rs7017898	1.18e-09
8	ZC2HC1A	rs2086755	6.03e-10
8	ZC2HC1A	rs62518985	8.19e-10
8	ZC2HC1A	rs7010299	2.83e-09
8	ZC2HC1A	rs2046338	9.72e-10
8	ZC2HC1A	rs62519001	9.72e-10
8	C8orf31	rs7015223	1.8e-09
8	C8orf31	rs12546527	6.3e-09
8	C8orf31	rs35988744	1.49e-09
8	C8orf31	rs7006485	1.28e-09
8	C8orf31	rs6998422	5.46e-10
8	C8orf31	rs11777521	5.6e-09
8	C8orf31	rs7828338	3.34e-09
8	C8orf31	rs28496313	1.54e-09
8	C8orf31	rs28654890	1.55e-09
8	C8orf31	rs28454462	1.28e-09
8	C8orf31	rs78646776	1.29e-08
8	C8orf31	rs10112689	1.29e-08
8	C8orf31	rs34729339	1.29e-08
8	C8orf31	rs4977126	1.73e-08
8	C8orf31	rs4641041	1.44e-08
8	NAPRT1	rs11136303	0
8	NAPRT1	rs4874159	0
8	NAPRT1	rs3812448	0
8	NAPRT1	rs4495441	0
8	NAPRT1	rs2010898	0
8	NAPRT1	rs7821226	0
8	NAPRT1	rs1057556	0
8	NAPRT1	rs4874165	0
8	NAPRT1	rs113122933	0
8	NAPRT1	rs62522224	0
8	NAPRT1	rs6997021	0
8	NAPRT1	rs10107353	0
8	SAMD12	rs56707073	7.24e-09
8	SAMD12	rs73323004	6.82e-10
8	XKR9	rs34905858	3.12e-09
8	XKR9	rs13257800	1.12e-09
8	XKR9	rs35092173	1.9e-09
8	FAM167A	rs7014311	2.72e-10
8	FAM167A	rs4840562	3.21e-09
8	FAM167A	rs4840565	1.58e-09
8	FAM167A	rs13272061	9.3e-09
9	2017-12-01	rs72762339	1.63e-08
9	2017-12-01	rs7040243	1.52e-08
9	POLR1E	rs10814554	0
9	POLR1E	rs12377791	0
9	POLR1E	rs2274479	0
9	POLR1E	rs7863996	5.83e-10
9	POLR1E	rs7867542	5.83e-10
9	POLR1E	rs4878694	5.83e-10
9	POLR1E	rs10973372	6.06e-10
9	POLR1E	rs74553341	6e-10
9	POLR1E	rs6476635	5.83e-10
9	POLR1E	rs10973382	5.83e-10
9	POLR1E	rs10973384	4.7e-10
9	POLR1E	rs73646388	5.83e-10
9	POLR1E	rs2296775	5.83e-10
9	POLR1E	rs2296776	5.83e-10
9	POLR1E	rs2296778	5.83e-10
9	POLR1E	rs10814571	0
9	POLR1E	rs11792930	5.83e-10
9	POLR1E	rs4878153	4.31e-10
9	POLR1E	rs10814573	7.28e-09
9	MEGF9	rs34089221	1.04e-08
10	STOX1	rs10998412	1.02e-08
10	STOX1	rs6480364	0
10	STOX1	rs1163196	3.47e-10
10	IFIT5	rs7897602	4.39e-09
10	IFIT5	rs303218	1.38e-08
11	RP11-705O3.1	rs622074	1.09e-09
11	RP11-705O3.1	rs634768	0
11	RP11-705O3.1	rs12276887	0
11	RP11-705O3.1	rs12276891	0
11	RP11-705O3.1	rs588584	8.39e-09
11	RP11-705O3.1	rs584981	0
11	RP11-705O3.1	rs11237379	1.09e-08
11	RP11-705O3.1	rs114165	0
11	RP11-705O3.1	rs681717	0
11	RP11-705O3.1	rs10899437	0
11	RP11-705O3.1	rs672384	0
11	RP11-705O3.1	rs10793282	0
11	RP11-705O3.1	rs10793283	0
11	RP11-705O3.1	rs509456	0
11	RP11-705O3.1	rs603771	0
11	RP11-705O3.1	rs2845556	0
11	RP11-705O3.1	rs572232	0
11	RP11-705O3.1	rs1789032	0
11	RP11-705O3.1	rs590981	0
11	RP11-705O3.1	rs653721	0
11	RP11-705O3.1	rs516971	0
11	RP11-705O3.1	rs586824	0
11	RP11-705O3.1	rs577857	0
11	RP11-705O3.1	rs677513	0
11	RP11-705O3.1	rs564283	0
11	RP11-705O3.1	rs679875	0
11	RP11-705O3.1	rs643430	0
11	RP11-705O3.1	rs977978	5.84e-10
11	RP11-705O3.1	rs637149	0
11	RP11-705O3.1	rs1263724	0
11	RP11-705O3.1	rs1263577	0
11	RP11-705O3.1	rs1144764	2.96e-10
11	RP11-705O3.1	rs28547	0
11	RP11-705O3.1	rs230669	0
11	RP11-705O3.1	rs230667	0
11	RP11-705O3.1	rs527462	0
11	RP11-705O3.1	rs640537	2.76e-10
11	SNX32	rs1151519	9.67e-10
11	SNX32	rs601863	1.92e-09
11	SNX32	rs658524	9.67e-10
11	SNX32	rs645900	9.67e-10
11	SNX32	rs658938	9.67e-10
11	SNX32	rs568617	9.67e-10
11	SNX32	rs694994	9.67e-10
11	SNX32	rs677931	1.17e-09
11	SNX32	rs693824	1.17e-09
11	SNX32	rs641018	1.17e-09
11	SNX32	rs656980	1.17e-09
11	SNX32	rs10896065	1.17e-09
11	SNX32	rs7927790	2.6e-09
11	SNX32	rs10791831	2.6e-09
11	XRRA1	rs4944960	0
11	XRRA1	rs7928381	0
11	XRRA1	rs673731	0
11	XRRA1	rs12419113	0
11	XRRA1	rs59328242	0
11	ASRGL1	rs17157147	4.13e-09
11	TIMM10	rs4938870	0
12	GS1-410F4.2	rs79466445	4.79e-10
12	ITGA7	rs7310164	5.84e-09
12	RP13-735L24.1	rs10843494	1.21e-09
12	RP13-735L24.1	rs4444131	0
12	RP13-735L24.1	rs9668938	0
12	TCTN2	rs11572940	1.74e-08
12	TCTN2	rs7971452	1.74e-08
12	TCTN2	rs7967780	1.74e-08
12	TCTN2	rs11572949	1.74e-08
12	TCTN2	rs4930737	1.74e-08
12	CDK2AP1	rs1615350	1.47e-09
12	CDK2AP1	rs1618679	1.47e-09
12	CDK2AP1	rs1621194	1.47e-09
12	CDK2AP1	rs2682426	1.23e-09
12	CDK2AP1	rs2950537	1.5e-09
12	CDK2AP1	rs3018098	1.5e-09
12	CDK2AP1	rs1790097	2.03e-09
12	CDK2AP1	rs1790124	1.02e-08
12	CDK2AP1	rs1716164	3.43e-09
12	CDK2AP1	rs2851447	1.15e-09
12	CDK2AP1	rs1790135	4.22e-09
12	CDK2AP1	rs1790088	3.57e-09
12	CDK2AP1	rs2947099	3.57e-09
12	CDK2AP1	rs1716180	1.61e-09
12	CDK2AP1	rs1716182	1.15e-09
12	CDK2AP1	rs1727290	2.82e-09
12	CDK2AP1	rs1270594	1.15e-09
12	CDK2AP1	rs2851443	1.34e-09
12	CDK2AP1	rs10744148	1.4e-09
12	CDK2AP1	rs10772996	1.15e-09
12	CDK2AP1	rs1727325	7.06e-09
12	CDK2AP1	rs1727323	1.15e-09
12	CDK2AP1	rs1727322	1.39e-08
12	CDK2AP1	rs1716160	1.15e-09
12	CDK2AP1	rs1790131	1.15e-09
12	CDK2AP1	rs1727319	1.15e-09
12	CDK2AP1	rs2851451	1.15e-09
12	CDK2AP1	rs2682431	1.57e-09
12	CDK2AP1	rs1716178	3.87e-09
12	CDK2AP1	rs1790101	1.15e-09
12	CDK2AP1	rs1790102	1.15e-09
12	CDK2AP1	rs1630693	3.11e-09
12	CDK2AP1	rs1790104	1.15e-09
12	CDK2AP1	rs10846486	1.15e-09
12	CDK2AP1	rs1790096	1.32e-09
12	CDK2AP1	rs2851435	1.15e-09
12	CDK2AP1	rs941306	1.54e-09
12	CDK2AP1	rs1727331	7.89e-10
12	CDK2AP1	rs7304782	7.99e-10
12	CDK2AP1	rs10744150	1.61e-09
12	CDK2AP1	rs10846487	1.04e-09
12	CDK2AP1	rs12817892	1.04e-09
12	CDK2AP1	rs12818067	1.28e-09
12	CDK2AP1	rs7137286	2.9e-09
12	CDK2AP1	rs11057210	9.96e-10
12	CDK2AP1	rs1568428	1.02e-09
12	CDK2AP1	rs1533703	8.44e-10
12	CDK2AP1	rs4759371	1.04e-09
12	CDK2AP1	rs4759415	1.04e-09
12	CDK2AP1	rs10732573	1.04e-09
12	CDK2AP1	rs1980252	1.02e-09
12	CDK2AP1	rs4759417	1.02e-09
12	CDK2AP1	rs10773002	1.02e-09
12	CDK2AP1	rs12824957	5.31e-10
12	CDK2AP1	rs4553407	1.59e-09
12	CDK2AP1	rs11057222	1.59e-09
12	CDK2AP1	rs1109559	1.59e-09
12	RP11-291B21.2	rs73070602	3.23e-10
12	RP11-291B21.2	rs10743908	0
12	RP11-291B21.2	rs2417903	0
12	RP11-291B21.2	rs2417904	1.46e-08
12	RP11-291B21.2	rs7305642	0
12	RP11-291B21.2	rs59007580	9.3e-09
12	RP11-291B21.2	rs4319593	6.64e-10
12	RP11-291B21.2	rs4237929	6.64e-10
12	RP11-291B21.2	rs6488306	1.2e-09
12	RP11-291B21.2	rs142013729	3.28e-09
12	SPRYD4	rs2638335	3.43e-10
12	SPRYD4	rs2638285	3.43e-10
12	SPRYD4	rs2657908	3.43e-10
12	RPS26	rs2048036	0
12	RPS26	rs17118208	0
12	RPS26	rs61937248	9.77e-10
12	RPS26	rs11550558	9.77e-10
12	RPS26	rs34962186	5.56e-09
12	RPS26	rs705702	2.18e-09
12	RPS26	rs772922	1.66e-09
12	RPS26	rs772923	1.66e-09
12	RPS26	rs4759229	0
12	RPS26	rs7971751	8.58e-11
12	RPS26	rs877636	3.16e-09
12	RPS26	rs705696	0
12	RPS26	rs2292239	0
12	RPS26	rs2229046	0
12	RPS26	rs773122	0
12	RPS26	rs773120	0
12	XRCC6BP1	rs4373979	8.03e-09
13	DNAJC15	rs17624339	1.75e-10
13	DNAJC15	rs17553846	0
13	DNAJC15	rs12584852	1.42e-09
13	DNAJC15	rs77013239	1.5e-09
13	DNAJC15	rs9533356	2.51e-09
13	DNAJC15	rs7325818	8.55e-09
13	DNAJC15	rs9533361	3.45e-09
13	DNAJC15	rs2324996	8.71e-09
13	DNAJC15	rs9533366	8.71e-09
13	DNAJC15	rs11617373	8.71e-09
13	DNAJC15	rs7322458	1.01e-08
13	DNAJC15	rs2762170	1.52e-08
13	DNAJC15	rs9525731	0
13	DNAJC15	rs9525732	6.79e-09
13	DNAJC15	rs9533378	1.08e-08
13	DNAJC15	rs8001650	1.38e-08
13	DNAJC15	rs7321162	2.33e-09
13	DNAJC15	rs1547133	3.51e-09
13	DNAJC15	rs73190322	1.61e-08
13	DNAJC15	rs73190325	4.57e-09
13	DNAJC15	rs2456243	4.95e-09
13	DNAJC15	rs9594885	4.95e-09
13	DNAJC15	rs9525742	4.95e-09
13	DNAJC15	rs9533391	1.34e-08
13	DNAJC15	rs76519343	3.12e-09
13	DNAJC15	rs9594892	1.71e-08
14	ACOT4	rs10145553	0
14	ACOT4	rs9323590	0
14	ACOT4	rs7143627	0
14	PRKD1	rs6571322	0
14	PRKD1	rs2095310	0
14	PRKD1	rs6571324	2.34e-09
14	PRKD1	rs10133259	1.09e-09
14	PRKD1	rs8014453	2.74e-09
14	PRKD1	rs950136	1.06e-09
14	PRKD1	rs17096124	2.36e-09
14	PRKD1	rs10498312	4.06e-09
14	RAB15	rs380741	1.39e-09
14	RAB15	rs435335	1.9e-09
14	RAB15	rs6573581	5.97e-09
14	RAB15	rs11628910	5.97e-09
14	RAB15	rs7144515	5.97e-09
14	RAB15	rs7144718	5.97e-09
14	RAB15	rs7149922	5.97e-09
14	RAB15	rs66883381	5.97e-09
14	RAB15	rs2181127	4.78e-09
14	RAB15	rs2357866	4.78e-09
14	RAB15	rs1951494	4.78e-09
15	ADAMTS7	rs7497235	1.07e-08
15	ADAMTS7	rs899997	5.63e-09
15	ADAMTS7	rs12901228	7.37e-09
15	ADAMTS7	rs76412132	7.37e-09
15	ADAMTS7	rs75884254	7.37e-09
15	ADAMTS7	rs12906165	1.21e-08
15	ADAMTS7	rs71402966	3.15e-09
15	ADAMTS7	rs71402967	1.38e-09
15	ADAMTS7	rs2017091	2.37e-09
15	ADAMTS7	rs12904489	2.37e-09
15	ADAMTS7	rs4887092	1.63e-09
15	ADAMTS7	rs12910831	2.37e-09
15	ADAMTS7	rs2589373	2.55e-09
15	ADAMTS7	rs11072800	2.37e-09
15	ADAMTS7	rs2622821	7.26e-10
15	ADAMTS7	rs3743068	3.13e-09
15	ADAMTS7	rs1564499	3.13e-09
15	ADAMTS7	rs12442476	6.07e-09
15	NDUFAF1	rs28712264	0
15	NDUFAF1	rs7176588	0
15	NDUFAF1	rs77500865	0
15	NDUFAF1	rs7162231	0
15	NDUFAF1	rs28643296	0
15	NDUFAF1	rs75285513	0
15	NDUFAF1	rs28448670	0
15	NDUFAF1	rs7175690	0
15	NDUFAF1	rs80250236	0
15	NDUFAF1	rs7163989	0
15	NDUFAF1	rs7165675	0
15	NDUFAF1	rs111573424	0
15	NDUFAF1	rs75203302	0
15	NDUFAF1	rs111962400	0
15	NDUFAF1	rs78588624	0
15	NDUFAF1	rs28617619	0
15	NDUFAF1	rs74719719	0
15	NDUFAF1	rs58910172	0
15	NDUFAF1	rs7182324	0
15	NDUFAF1	rs7181982	0
15	NDUFAF1	rs74376607	0
15	NDUFAF1	rs11629979	0
15	NDUFAF1	rs13313520	0
15	NDUFAF1	rs8036026	0
15	NDUFAF1	rs58335029	0
15	NDUFAF1	rs72739630	0
15	NDUFAF1	rs7183337	0
15	NDUFAF1	rs7165914	0
15	NDUFAF1	rs56341337	0
15	NDUFAF1	rs73404980	0
15	NDUFAF1	rs28477406	0
15	NDUFAF1	rs8023530	0
15	NDUFAF1	rs112547435	5.32e-10
15	NDUFAF1	rs11070328	0
15	NDUFAF1	rs919961	0
15	NDUFAF1	rs12324291	3.05e-09
15	NDUFAF1	rs28728213	0
15	NDUFAF1	rs28716108	0
15	NDUFAF1	rs16971798	0
15	NDUFAF1	rs28535540	0
15	NDUFAF1	rs73404994	0
15	NDUFAF1	rs73404995	0
15	NDUFAF1	rs73405000	0
15	NDUFAF1	rs73405001	0
15	NDUFAF1	rs28661013	0
15	NDUFAF1	rs10152497	0
15	NDUFAF1	rs7168431	0
15	NDUFAF1	rs1899	0
15	NDUFAF1	rs111895690	0
15	NDUFAF1	rs8036734	0
15	NDUFAF1	rs28555198	0
15	NDUFAF1	rs7164684	3.28e-10
15	NDUFAF1	rs7164211	0
15	NDUFAF1	rs28576457	0
15	NDUFAF1	rs28459164	0
15	NDUFAF1	rs28673484	0
15	NDUFAF1	rs111787670	0
15	NDUFAF1	rs28663426	0
15	NDUFAF1	rs76480218	0
15	NDUFAF1	rs113797240	4.92e-10
15	NDUFAF1	rs79577197	0
15	NDUFAF1	rs1757468	0
15	NDUFAF1	rs316616	0
15	NDUFAF1	rs78185622	0
15	NDUFAF1	rs77358972	0
15	TTBK2	rs4924692	1.05e-09
15	TGM5	rs7166467	4.51e-09
15	TGM5	rs1834642	8.69e-09
15	TGM5	rs579178	6.88e-09
15	TGM5	rs502157	6.88e-09
15	TGM5	rs28756768	7.94e-09
15	TGM5	rs530188	0
15	TGM5	rs555001	0
15	TGM5	rs572959	8.55e-10
15	TGM5	rs573169	0
15	TGM5	rs574065	0
15	TGM5	rs524547	0
15	TGM5	rs554001	0
15	TGM5	rs501884	0
15	TGM5	rs504417	0
15	TGM5	rs560134	0
15	TGM5	rs564946	0
15	TGM5	rs565658	0
15	TGM5	rs11853991	0
15	TGM5	rs66651343	0
15	TGM5	rs579651	0
15	TGM5	rs471122	0
15	TGM5	rs473016	0
15	TGM5	rs12911132	1.06e-08
15	TGM5	rs531910	0
15	TGM5	rs491804	0
15	TGM5	rs492743	0
15	TGM5	rs35278581	1.06e-08
15	TGM5	rs570272	0
15	TGM5	rs493444	0
15	TGM5	rs1095389	0
15	TGM5	rs530683	0
15	TGM5	rs523737	0
15	TGM5	rs17779494	0
15	TGM5	rs513970	0
15	TGM5	rs825740	0
15	TGM5	rs524527	0
15	TGM5	rs484846	1.29e-08
15	TGM5	rs28578454	0
15	TGM5	rs7176923	0
15	TGM5	rs956391	0
15	TGM5	rs7048	0
15	TGM5	rs933941	0
15	TGM5	rs2278859	0
15	TGM5	rs7168940	0
15	TGM5	rs34515241	0
15	TGM5	rs17780417	0
15	TGM5	rs16957627	0
15	TGM5	rs16957630	0
15	TGM5	rs7181634	0
15	TGM5	rs6493084	0
15	TGM5	rs28702649	0
15	TGM5	rs4401024	0
15	TGM5	rs1133395	0
15	TGM5	rs55748552	0
15	TGM5	rs6493085	0
15	TGM5	rs34767197	0
15	TGM5	rs2278860	0
15	FAM154B	rs67988426	4.78e-09
15	FAM154B	rs8043108	4.78e-09
15	FAM154B	rs61421773	5.25e-09
15	FAM154B	rs74030948	4.78e-09
15	FAM154B	rs74030949	1.32e-08
15	FAM154B	rs28715426	3.55e-10
15	FAM154B	rs13380317	3.55e-10
15	FAM154B	rs13380319	3.55e-10
15	FAM154B	rs28542949	3.55e-10
15	FAM154B	rs28752301	1.83e-10
16	C16orf5	rs35421439	6.16e-09
16	GCSH	rs2970077	1.45e-09
16	GCSH	rs2549891	0
16	GCSH	rs9926366	1.66e-09
16	GCSH	rs75422577	7.18e-10
16	GCSH	rs2549899	1.06e-09
16	GCSH	rs76892049	7.78e-10
16	GCSH	rs11865207	3.5e-10
16	GCSH	rs2911159	3.5e-10
16	GCSH	rs2602407	8.37e-10
16	GCSH	rs10459871	3.5e-10
16	GCSH	rs75923695	1.04e-09
16	GCSH	rs804885	1.19e-09
16	GCSH	rs77475047	6.23e-10
16	GCSH	rs7206814	1.85e-09
16	CLEC18A	rs6499281	3.77e-09
16	RMI2	rs1794023	6.61e-09
16	RMI2	rs4781058	1.4e-08
16	RMI2	rs430966	1.43e-08
16	RMI2	rs9922058	1.07e-08
16	RMI2	rs12922409	7.63e-10
16	RMI2	rs35051965	2e-09
16	RMI2	rs56136462	8.13e-10
16	RMI2	rs62023635	9.91e-10
16	RMI2	rs12928968	1.11e-09
16	RMI2	rs12448960	9.66e-10
16	C16orf88	rs8044607	0
16	C16orf88	rs56064636	0
16	C16orf88	rs11641968	0
16	C16orf88	rs4782269	0
16	C16orf88	rs2074037	0
16	C16orf88	rs4782272	0
16	C16orf88	rs62024961	0
16	C16orf88	rs59193330	0
16	C16orf88	rs62024964	0
16	C16orf88	rs739564	0
16	C16orf88	rs739563	0
16	C16orf88	rs56112689	0
16	C16orf88	rs16972322	0
16	C16orf88	rs8055485	0
16	C16orf88	rs1858975	0
16	C16orf88	rs4782277	0
16	C16orf88	rs4782278	0
16	C16orf88	rs4782279	0
16	C16orf88	rs4780826	0
16	C16orf88	rs4782280	0
16	C16orf88	rs8053400	0
16	C16orf88	rs6497401	0
16	C16orf88	rs7195053	0
16	C16orf88	rs11642322	0
16	C16orf88	rs62025012	0
16	C16orf88	rs4782281	0
16	C16orf88	rs11646817	0
16	C16orf88	rs11647001	0
16	C16orf88	rs8052404	0
16	C16orf88	rs72769543	0
16	C16orf88	rs2047889	0
16	C16orf88	rs28681321	0
16	C16orf88	rs1021865	0
16	C16orf88	rs8045761	0
16	C16orf88	rs62025019	0
16	C16orf88	rs9933567	0
16	C16orf88	rs11648873	0
16	C16orf88	rs7198630	0
16	C16orf88	rs9932521	0
16	C16orf88	rs6497404	0
16	C16orf88	rs7201818	0
16	C16orf88	rs13332674	0
16	C16orf88	rs28896609	0
16	C16orf88	rs9788912	0
16	C16orf88	rs11865403	0
16	IRX6	rs9921178	0
17	SLFN5	rs146915863	2.52e-10
17	SLFN5	rs4796053	2.38e-10
17	SLFN5	rs1480947	1.57e-10
17	SLFN5	rs55696198	0
17	SLFN5	rs35057538	0
17	SLFN5	rs4796062	0
17	SLFN5	rs59008536	0
17	SLFN5	rs11080324	0
17	MXRA7	rs9916811	1.76e-09
17	XYLT2	rs17560297	8.68e-11
17	HEATR6	rs2302201	0
17	HEATR6	rs56063253	0
17	PSMD11	rs9901737	6.54e-09
17	PSMD11	rs8065246	6.54e-09
17	GJC1	rs1071682	1.75e-10
17	GJC1	rs7224602	1.29e-09
17	GJC1	rs8077272	6.03e-09
17	GJC1	rs11658874	3.37e-09
17	GJC1	rs7216587	3.33e-09
17	GJC1	rs71373521	3.37e-09
17	GJC1	rs12451394	3.37e-09
17	GJC1	rs3744473	3.37e-09
17	GJC1	rs2289679	1.25e-08
17	SPATA20	rs4794147	1.22e-08
17	SPATA20	rs6504667	1.51e-08
17	RP11-45M22.1	rs4985697	0
17	NT5C3L	rs17498604	0
17	NT5C3L	rs11657944	0
17	NT5C3L	rs1319763	0
17	NT5C3L	rs4796736	0
17	NT5C3L	rs67473931	0
17	NT5C3L	rs4796738	0
17	NT5C3L	rs34427808	0
17	NT5C3L	rs8071938	0
17	TMEM106A	rs8176082	0
17	TMEM106A	rs12947782	0
17	TMEM106A	rs33945274	0
17	TMEM106A	rs11653069	0
17	TMEM106A	rs4793210	0
17	TMEM106A	rs4792982	0
17	TMEM106A	rs12940037	0
17	TMEM106A	rs11654731	0
17	TMEM106A	rs11656945	0
17	TMEM106A	rs8074136	0
17	TMEM106A	rs33924658	0
17	TMEM106A	rs35989681	0
17	TMEM106A	rs3744244	0
17	TMEM106A	rs113488312	0
17	TMEM106A	rs34086156	0
17	TMEM106A	rs113429486	0
17	TMEM106A	rs34053645	0
17	TMEM106A	rs34977165	0
17	TMEM106A	rs35612701	0
17	TMEM106A	rs36114164	0
17	TMEM106A	rs34576341	0
17	TMEM106A	rs9675035	0
17	TMEM106A	rs11654051	3.34e-10
17	TMEM106A	rs34572725	0
17	TMEM106A	rs9897425	0
17	TMEM106A	rs4793236	0
17	ARL16	rs62077190	0
17	NBR2	rs8176318	2.49e-10
17	NBR2	rs8176297	4.98e-10
17	NBR2	rs8176290	2.09e-10
17	NBR2	rs10445320	4.98e-10
17	NBR2	rs799912	2.86e-10
17	NBR2	rs8176130	2.31e-10
17	NBR2	rs8176120	2.08e-10
17	NBR2	rs8176082	6.84e-10
17	NBR2	rs11653069	4.27e-10
17	NBR2	rs4792982	2.49e-10
17	NBR2	rs11656945	2.89e-10
17	NBR2	rs33924658	3.44e-10
17	NBR2	rs34086156	3.68e-10
17	NBR2	rs34977165	4.28e-10
17	FTSJ3	rs9747945	0
17	FTSJ3	rs4968595	0
17	FTSJ3	rs57108948	0
17	FTSJ3	rs7501614	1.91e-10
17	FTSJ3	rs146551113	0
17	FTSJ3	rs8075422	1.12e-09
17	FTSJ3	rs8075061	0
17	FTSJ3	rs8075521	0
17	FTSJ3	rs62077484	8.53e-10
17	FTSJ3	rs7223412	0
17	FTSJ3	rs8079161	0
17	FTSJ3	rs7219920	2.62e-09
17	FTSJ3	rs8066754	0
17	FTSJ3	rs8067431	0
17	FTSJ3	rs111729849	0
17	FTSJ3	rs8066463	0
17	FTSJ3	rs3826341	0
17	FTSJ3	rs1877318	0
17	FTSJ3	rs8069969	0
17	FTSJ3	rs6504182	0
17	FTSJ3	rs9207	0
17	FTSJ3	rs8079818	0
17	FTSJ3	rs8066719	0
17	FTSJ3	rs11653264	0
17	FTSJ3	rs11654106	0
17	FTSJ3	rs9911714	0
17	FTSJ3	rs3785572	0
17	FTSJ3	rs7217982	0
17	FTSJ3	rs11870815	0
17	FTSJ3	rs4968598	0
17	FTSJ3	rs4968663	0
17	FTSJ3	rs7222189	6.03e-10
17	FTSJ3	rs35844156	0
17	FTSJ3	rs62077504	0
17	FTSJ3	rs7208397	3.16e-10
17	FTSJ3	rs11654841	0
17	FTSJ3	rs8081454	0
17	FTSJ3	rs58269663	0
17	FTSJ3	rs113140273	0
17	FTSJ3	rs78172786	0
17	FTSJ3	rs57553639	0
17	FTSJ3	rs8067102	0
17	FTSJ3	rs6504185	0
17	FTSJ3	rs56295011	0
17	FTSJ3	rs8077013	0
17	FTSJ3	rs62077512	0
17	FTSJ3	rs3760254	0
17	FTSJ3	rs9895920	0
17	FTSJ3	rs58131426	0
17	FTSJ3	rs9906247	3.67e-10
17	FTSJ3	rs7221853	0
17	FTSJ3	rs2016172	0
17	FTSJ3	rs2044125	0
17	FTSJ3	rs2584640	0
17	FTSJ3	rs2584639	0
17	FTSJ3	rs6504186	0
17	FTSJ3	rs2584638	0
17	FTSJ3	rs9747164	0
17	FTSJ3	rs2665853	0
17	FTSJ3	rs7207569	2.86e-10
17	FTSJ3	rs7222060	0
17	FTSJ3	rs9915552	0
17	FTSJ3	rs11659013	0
17	FTSJ3	rs11869932	0
17	FTSJ3	rs2597636	0
17	FTSJ3	rs2665842	0
17	FTSJ3	rs2727332	0
17	FTSJ3	rs11654651	0
17	FTSJ3	rs2584633	7.02e-11
17	FTSJ3	rs2584632	0
17	FTSJ3	rs11656575	0
17	FTSJ3	rs9902275	0
17	FTSJ3	rs2727292	0
17	FTSJ3	rs2727290	0
17	FTSJ3	rs1062791	0
17	FTSJ3	rs2665836	0
17	FTSJ3	rs2727288	0
17	FTSJ3	rs2584627	0
17	FTSJ3	rs894407	0
17	FTSJ3	rs894406	0
17	FTSJ3	rs716880	2.66e-10
17	FTSJ3	rs2584626	0
17	FTSJ3	rs2665835	0
17	FTSJ3	rs2584625	0
17	FTSJ3	rs2584624	0
17	FTSJ3	rs2665834	0
17	FTSJ3	rs2727287	0
17	FTSJ3	rs968719	0
17	FTSJ3	rs7220892	0
17	FTSJ3	rs13030	0
17	FTSJ3	rs6919	0
17	FTSJ3	rs2584622	0
17	FTSJ3	rs2665832	0
17	FTSJ3	rs7209758	0
17	FTSJ3	rs2028567	0
17	FTSJ3	rs894413	0
17	FTSJ3	rs894414	0
17	FTSJ3	rs8076760	0
17	FTSJ3	rs2002772	0
17	FTSJ3	rs2665798	0
17	FTSJ3	rs2727322	0
17	FTSJ3	rs2727323	0
17	FTSJ3	rs2665797	0
17	FTSJ3	rs2727326	2.59e-09
17	FTSJ3	rs2727327	0
17	FTSJ3	rs2727328	0
17	FTSJ3	rs2584618	0
17	FTSJ3	rs2665796	0
17	FTSJ3	rs11658175	0
17	FTSJ3	rs2665795	0
17	FTSJ3	rs2584617	0
17	FTSJ3	rs2727330	0
17	FTSJ3	rs2584616	0
17	FTSJ3	rs2727276	0
17	FTSJ3	rs56383601	0
17	FTSJ3	rs2727355	0
17	FTSJ3	rs2584612	0
17	FTSJ3	rs2665837	0
17	FTSJ3	rs9899491	0
17	FTSJ3	rs2584610	0
17	FTSJ3	rs9914206	0
17	FTSJ3	rs2584609	0
17	FTSJ3	rs2156903	0
17	FTSJ3	rs2236737	0
17	FTSJ3	rs2584607	0
17	FTSJ3	rs2854222	0
17	FTSJ3	rs114027117	0
17	FTSJ3	rs2854221	0
17	FTSJ3	rs8075277	0
17	FTSJ3	rs2584642	0
17	FTSJ3	rs2584637	0
17	FTSJ3	rs2727286	0
17	FTSJ3	rs2665826	0
17	FTSJ3	rs2854214	3.8e-10
17	FTSJ3	rs2854212	0
17	FTSJ3	rs2854211	0
17	FTSJ3	rs2854208	0
17	FTSJ3	rs2854202	0
17	FTSJ3	rs2854201	0
17	FTSJ3	rs2854199	0
17	FTSJ3	rs2854198	0
17	FTSJ3	rs62072238	0
17	FTSJ3	rs2257281	3.24e-10
17	FTSJ3	rs2665801	3.24e-10
17	FTSJ3	rs2665847	3.24e-10
17	FTSJ3	rs2665848	3.24e-10
17	FTSJ3	rs2727351	1.24e-09
17	FTSJ3	rs2665849	4.28e-10
17	FTSJ3	rs2727352	1.44e-09
17	FTSJ3	rs2665850	2.87e-10
17	FTSJ3	rs2008053	3.24e-10
17	FTSJ3	rs2457681	3.24e-10
17	FTSJ3	rs3020613	0
17	FTSJ3	rs2854192	5.25e-10
17	FTSJ3	rs2727318	4.47e-10
17	FTSJ3	rs2727315	0
17	FTSJ3	rs2665828	7.84e-10
17	FTSJ3	rs2727314	1.48e-09
17	FTSJ3	rs2727313	3.24e-10
17	ATP6V0A1	rs744166	8.99e-09
17	DHX58	rs1557746	8.4e-10
17	DHX58	rs1557745	8.4e-10
17	DHX58	rs35493105	8.4e-10
17	DHX58	rs34017719	0
17	DHX58	rs8081327	7.43e-10
17	DHX58	rs1122326	7.43e-10
18	SERPINB10	rs9951203	0
18	SERPINB10	rs9320028	0
18	SERPINB10	rs8085484	0
18	SERPINB10	rs9966895	0
18	SERPINB10	rs9944904	0
18	SERPINB10	rs9967075	0
18	SERPINB10	rs9958892	0
18	SERPINB10	rs8091945	0
18	SERPINB10	rs79723243	0
18	SERPINB10	rs9954616	0
18	SERPINB10	rs9966495	0
18	SERPINB10	rs9951512	0
18	SERPINB10	rs9957911	0
18	SERPINB10	rs28792433	0
18	SERPINB10	rs9946657	0
18	SERPINB10	rs3760574	0
18	SERPINB10	rs6093	0
18	SERPINB10	rs9630856	0
18	SERPINB10	rs9951303	0
18	SERPINB10	rs3942631	0
18	SERPINB10	rs1532886	0
18	SERPINB10	rs2332874	0
18	SERPINB10	rs2114380	0
18	SERPINB10	rs2278178	0
18	SERPINB10	rs9955420	0
18	SERPINB10	rs1544896	0
18	SERPINB10	rs1544893	0
18	SERPINB10	rs6102	1.69e-09
18	SERPINB10	rs6104	0
18	SERPINB10	rs12102	0
18	SERPINB10	rs28505577	0
18	SERPINB10	rs1955360	1.69e-09
18	SERPINB10	rs4499334	0
18	SERPINB10	rs4293483	1.76e-09
18	SERPINB10	rs4500849	1.32e-09
18	SERPINB10	rs4292015	1.73e-09
18	SERPINB10	rs4503905	1.47e-09
18	SERPINB10	rs9957913	1.76e-09
18	SERPINB10	rs9955526	0
18	SERPINB10	rs9966904	0
18	SERPINB10	rs9966202	2.97e-09
18	SERPINB10	rs56044463	0
18	SERPINB10	rs12327005	2.66e-09
18	SERPINB10	rs12327162	1.76e-09
18	SERPINB10	rs58264405	1.97e-09
18	SERPINB10	rs12327173	0
18	SERPINB10	rs8086765	1.76e-09
18	SERPINB10	rs8086048	1.76e-09
18	SERPINB10	rs6567405	0
18	SERPINB10	rs7235983	4.71e-10
18	SERPINB10	rs1991317	0
18	SERPINB10	rs60850797	6.46e-09
18	SERPINB10	rs9953733	1.76e-09
18	SERPINB10	rs17072097	0
18	SERPINB10	rs28558645	1.76e-09
18	SERPINB10	rs8085341	1.76e-09
18	SERPINB10	rs8084931	1.76e-09
18	SERPINB10	rs17072109	0
18	SERPINB10	rs17072114	1.76e-09
18	SERPINB10	rs9320033	1.76e-09
18	SERPINB10	rs724558	0
18	SERPINB10	rs1944273	1.76e-09
18	SERPINB10	rs1944271	0
18	SERPINB10	rs9955171	1.76e-09
18	SERPINB10	rs8099238	1.76e-09
18	SERPINB10	rs9955876	1.76e-09
18	SERPINB10	rs17072146	1.76e-09
18	SERPINB10	rs9967382	1.76e-09
18	SERPINB10	rs17072152	0
18	SERPINB10	rs620535	0
18	SERPINB10	rs9947135	6.31e-09
18	SERPINB10	rs9947504	0
18	SERPINB10	rs7236189	1.76e-09
18	SERPINB10	rs17072163	1.76e-09
18	SERPINB10	rs976142	1.76e-09
18	SERPINB10	rs2114377	5.86e-09
18	SERPINB10	rs8094058	5.86e-09
18	SERPINB10	rs8089023	5.86e-09
18	SERPINB10	rs8090673	5.86e-09
18	SERPINB10	rs8095974	5.86e-09
18	SERPINB10	rs9955406	5.86e-09
18	SERPINB10	rs62097497	5.86e-09
18	SERPINB10	rs8086521	5.86e-09
18	SERPINB10	rs3786340	5.86e-09
18	SERPINB10	rs1544899	4.02e-09
18	SERPINB10	rs1544898	8.81e-09
18	SERPINB10	rs8084306	5.86e-09
18	SERPINB10	rs8084600	5.86e-09
18	SERPINB10	rs8096543	5.86e-09
18	SERPINB10	rs2078574	5.86e-09
18	SERPINB10	rs62097500	5.86e-09
18	SERPINB10	rs9964049	5.86e-09
18	SERPINB10	rs963075	5.86e-09
18	SERPINB10	rs17072204	2.83e-09
18	SERPINB10	rs17072209	5.86e-09
18	SERPINB10	rs2288286	5.86e-09
18	SERPINB10	rs17072210	5.86e-09
18	SERPINB10	rs8095893	5.86e-09
18	SERPINB10	rs9783898	2.42e-10
18	SERPINB10	rs9320034	3.49e-10
18	SERPINB10	rs9944952	1.78e-09
18	SERPINB10	rs72943554	1.78e-09
18	SERPINB10	rs28478697	1.58e-09
18	SERPINB10	rs9953837	1.22e-10
18	SERPINB10	rs8092289	1.58e-09
18	SERPINB10	rs55700832	7.64e-09
18	SERPINB10	rs72943567	3.8e-10
18	SERPINB10	rs9961020	2.98e-09
18	SERPINB10	rs17072279	1.37e-08
18	SERPINB10	rs9949621	1.37e-08
18	SERPINB10	rs3786343	1.22e-08
18	POLI	rs591507	0
18	HSBP1L1	rs2298645	0
18	HSBP1L1	rs7505247	0
18	HSBP1L1	rs12607279	0
18	HSBP1L1	rs62101236	0
18	HSBP1L1	rs11660677	0
18	HSBP1L1	rs12605166	0
18	TUBB6	rs9945901	3.1e-09
18	TXNL4A	rs12605166	1.81e-08
19	ZNF266	rs4804432	2.01e-09
19	ZNF266	rs57587967	0
19	ZNF266	rs10416297	8.72e-10
19	ZNF266	rs116896798	7.42e-10
19	ZNF266	rs55961351	4.09e-10
19	ZNF266	rs10425029	0
19	ZNF266	rs8100139	1.72e-08
19	ZNF266	rs10418267	1.72e-08
19	ZNF266	rs10408489	1.72e-08
19	ZNF266	rs1865041	1.72e-08
19	ZNF266	rs1865040	1.72e-08
19	ZNF266	rs10412980	1.72e-08
19	ZNF266	rs7247274	0
19	ZNF266	rs77915522	1.72e-08
19	ZNF266	rs56173576	6.79e-10
19	ZNF266	rs10423552	1.72e-08
19	ZNF266	rs7249948	0
19	ZNF266	rs10404549	1.72e-08
19	ZNF266	rs10164324	3.27e-10
19	ZNF266	rs10423538	1.72e-08
19	ZNF266	rs10426170	5.59e-10
19	ZNF266	rs8104700	3.27e-10
19	ZNF266	rs8100020	1.72e-08
19	ZNF266	rs8103099	2.01e-09
19	ZNF266	rs1142463	1.72e-08
19	ZNF266	rs10416662	1.23e-09
19	ZNF266	rs2304110	1.72e-08
19	ZNF266	rs10411115	1.72e-08
19	ZNF266	rs2217652	0
19	ZNF266	rs2116844	1.72e-08
19	ZNF266	rs2163809	3.02e-09
19	ZNF266	rs2082431	0
19	ZNF266	rs11666765	0
19	ZNF266	rs11671340	1.06e-08
19	ZNF266	rs2116842	2.39e-10
19	ZNF266	rs11086027	0
19	ZNF266	rs11672602	3.13e-09
19	ZNF266	rs7254016	0
19	ZNF266	rs7246082	3.13e-09
19	ZNF266	rs7257650	3.13e-09
19	ZNF266	rs2335532	0
19	ZNF266	rs8104641	3.13e-09
19	ZNF266	rs1583295	3.13e-09
19	ZNF266	rs1583294	7.79e-10
19	ZNF266	rs76643557	4.2e-09
19	ZNF266	rs144092292	2.27e-10
19	ZNF266	rs11883017	0
19	ZNF266	rs10423720	5.68e-09
19	ZNF266	rs8109962	3.63e-09
19	ZNF266	rs8105020	3.63e-09
19	ZNF266	rs7251490	4.36e-09
19	ZNF266	rs2241356	3.63e-09
19	ZNF266	rs7245716	8.73e-10
19	ZNF266	rs7258150	1.19e-09
19	ZNF266	rs7249517	1.19e-09
19	ZNF266	rs59277258	2.92e-10
19	ZNF266	rs1978712	2.45e-09
19	ZNF266	rs1978436	1.19e-09
19	ZNF266	rs1978438	0
19	ZNF266	rs28711703	0
19	ZNF266	rs58900528	1.19e-09
19	ZNF266	rs2112528	1.57e-09
19	ZNF266	rs7254750	1.19e-09
19	ZNF266	rs7258361	1.19e-09
19	ZNF266	rs56221935	5.97e-10
19	ZNF266	rs10406056	1.19e-09
19	ZNF266	rs7252370	2.92e-10
19	ZNF266	rs6512122	1.19e-09
19	ZNF266	rs9305082	1.19e-09
19	ZNF266	rs60618235	1.19e-09
19	ZNF266	rs8100444	5.25e-10
19	ZNF266	rs8105495	1.87e-09
19	ZNF266	rs35341497	3.78e-09
19	ZNF266	rs6512141	3.64e-09
19	ZNF266	rs8107808	6.06e-09
19	ZNF266	rs8111723	2.93e-09
19	ZNF266	rs35184442	2.93e-09
19	ZNF266	rs7257293	2.93e-09
19	ZNF266	rs7257399	3.65e-09
19	ZNF266	rs7249201	2.93e-09
19	ZNF266	rs971366	2.88e-09
19	ZNF266	rs10420126	9.83e-10
19	ZNF266	rs2335942	2.59e-09
19	ZNF266	rs147032612	6.07e-10
19	ZNF266	rs10402626	7.07e-10
19	ZNF266	rs10414028	6.59e-10
19	PLA2G4C	rs1653555	1.71e-08
19	PLA2G4C	rs11564520	1.71e-08
19	PLA2G4C	rs372535	9.87e-09
19	PLA2G4C	rs427750	0
19	PLA2G4C	rs251693	0
19	PLA2G4C	rs13436	0
19	PLA2G4C	rs156645	0
19	PLA2G4C	rs3731014	0
19	PLA2G4C	rs156638	0
19	PLA2G4C	rs274885	0
19	PLA2G4C	rs2288882	1.7e-09
19	PLA2G4C	rs3730974	0
19	PLA2G4C	rs2288881	0
19	PLA2G4C	rs2060235	1.67e-08
19	PLA2G4C	rs274898	1.7e-09
19	PLA2G4C	rs12462811	7.28e-09
19	PLA2G4C	rs274860	0
19	PLA2G4C	rs2163619	0
19	PLA2G4C	rs2116492	0
19	PLA2G4C	rs436303	0
19	PLA2G4C	rs3730872	0
19	PLA2G4C	rs9304672	0
19	ZNF257	rs7253053	1.6e-08
19	ZNF793	rs2385180	1.01e-08
19	GPATCH1	rs1559087	0
19	GPATCH1	rs1559088	6.57e-10
19	GPATCH1	rs1974783	3.54e-10
19	GPATCH1	rs12979164	8.28e-10
19	GPATCH1	rs7254912	8.28e-10
19	GPATCH1	rs4528686	8.28e-10
19	GPATCH1	rs8104805	2.04e-09
19	GPATCH1	rs8106453	8.5e-10
19	GPATCH1	rs12461297	5.09e-10
19	GPATCH1	rs10469278	0
19	GPATCH1	rs8104519	5.09e-10
19	GPATCH1	rs8107696	5.09e-10
19	GPATCH1	rs112816273	2.6e-10
19	GPATCH1	rs11672313	5.08e-10
19	GPATCH1	rs59425810	2.95e-10
19	GPATCH1	rs7260549	9.58e-10
19	GPATCH1	rs8104111	0
19	GPATCH1	rs7250177	4.81e-10
19	GPATCH1	rs7253723	4.81e-10
19	GPATCH1	rs2019603	1.37e-09
19	GPATCH1	rs12977993	0
19	GPATCH1	rs12610266	7.15e-10
19	GPATCH1	rs12610053	7.15e-10
19	GPATCH1	rs12610071	1.13e-09
19	GPATCH1	rs12608763	7.15e-10
19	GPATCH1	rs12460195	7.15e-10
19	GPATCH1	rs12976335	7.15e-10
19	GPATCH1	rs13345542	2.81e-09
19	GPATCH1	rs56261554	7.15e-10
19	GPATCH1	rs75442060	7.15e-10
19	GPATCH1	rs12609828	9.13e-10
19	GPATCH1	rs6510345	7.99e-10
19	GPATCH1	rs10406916	9.13e-10
19	GPATCH1	rs10410778	4.53e-10
19	GPATCH1	rs9783982	2.1e-09
19	GPATCH1	rs62125280	3.09e-10
19	GPATCH1	rs62125281	9.74e-10
19	GPATCH1	rs7259582	8.06e-10
19	GPATCH1	rs7247748	6.48e-10
19	GPATCH1	rs4805028	1.4e-09
19	GPATCH1	rs10408093	9.13e-10
19	GPATCH1	rs3760893	9.13e-10
19	GPATCH1	rs7249983	9.13e-10
19	GPATCH1	rs12460367	0
19	GPATCH1	rs3786934	9.47e-10
19	GPATCH1	rs3786933	9.47e-10
19	GPATCH1	rs8100392	1.79e-09
19	GPATCH1	rs10411921	3.39e-10
19	GPATCH1	rs16967815	1.29e-09
19	GPATCH1	rs2287680	1.46e-09
19	GPATCH1	rs77177483	7.05e-10
19	GPATCH1	rs56261509	0
19	GPATCH1	rs1981818	0
19	GPATCH1	rs17833533	7.68e-10
19	GPATCH1	rs10411610	0
20	RP4-564F22.5	rs1739644	0
20	RP4-564F22.5	rs4811821	0
20	RP4-564F22.5	rs1780634	0
20	RP4-564F22.5	rs2023561	0
20	RP4-564F22.5	rs1780635	0
20	RP4-564F22.5	rs2864144	4.21e-10
[truncated: 162 more rows]
